# Supplementary material for: Associations of occupational and leisure-time physical activity with all-cause mortality: an individual participant data meta-analysis
Source: HighWire-hosted journal article supplement (doi:10.1136/bjsports-2024-108117), 2024-09-10
Supplement: bjsports-2024-108117supp001_data_supplement.pdf [file bjsports-2024-108117supp001_data_supplement.pdf]

## Appendix 1. Overview of all variables that were requested from eligible studies.

| <b>Variable group</b>       | <b>Variables</b>                                                                                                                                                                                                                                                                                                                                                                                                                  |
|-----------------------------|-----------------------------------------------------------------------------------------------------------------------------------------------------------------------------------------------------------------------------------------------------------------------------------------------------------------------------------------------------------------------------------------------------------------------------------|
| <u>Predicting variables</u> | <ul style="list-style-type: none"> <li>• Occupational physical activity</li> <li>• Leisure-time physical activity</li> </ul>                                                                                                                                                                                                                                                                                                      |
| <u>Socioeconomic status</u> | <ul style="list-style-type: none"> <li>• Education level</li> <li>• Occupational class</li> <li>• Income</li> </ul>                                                                                                                                                                                                                                                                                                               |
| <u>Primary outcomes</u>     | <ul style="list-style-type: none"> <li>• All-cause mortality</li> </ul>                                                                                                                                                                                                                                                                                                                                                           |
| <u>Secondary outcomes</u>   | <ul style="list-style-type: none"> <li>• Cardiovascular mortality</li> <li>• Cardiovascular diseases in general</li> <li>• Specific cardiovascular diseases (e.g., ischaemic heart disease, myocardial infarction or stroke)</li> </ul>                                                                                                                                                                                           |
| <u>Health status</u>        | <ul style="list-style-type: none"> <li>• Adiposity (e.g., BMI, waist circumference or fat percentage)</li> <li>• Blood pressure (systolic and diastolic) and/or hypertension</li> <li>• Blood lipids, cholesterol and/or glucose</li> <li>• Cardiorespiratory fitness</li> <li>• Self-reported health</li> <li>• Other non-communicable diseases (e.g., diabetes, cancer, pulmonary diseases, mental health condition)</li> </ul> |
| <u>Other factors</u>        |                                                                                                                                                                                                                                                                                                                                                                                                                                   |
| Demographic factors         | <ul style="list-style-type: none"> <li>• Gender</li> <li>• Age</li> <li>• Ethnicity</li> <li>• Marital status</li> </ul>                                                                                                                                                                                                                                                                                                          |
| Lifestyle factors           | <ul style="list-style-type: none"> <li>• Smoking</li> <li>• Alcohol use</li> <li>• Diet (e.g., consumption of fruit and vegetables, sweets, snacks and sugary drinks)</li> <li>• Sleep duration/quality</li> <li>• Coffee use</li> <li>• Other (e.g., transport and/or household) domains of physical activity</li> </ul>                                                                                                         |
| Psychosocial factors        | <ul style="list-style-type: none"> <li>• Stress</li> <li>• Social support</li> <li>• Psychosocial work demands (e.g., decision authority, effort-rewards imbalance, job strain)</li> </ul>                                                                                                                                                                                                                                        |
| Material factors            | <ul style="list-style-type: none"> <li>• Health care utilisation</li> <li>• Medication use</li> <li>• Neighbourhood conditions</li> </ul>                                                                                                                                                                                                                                                                                         |
