# Supplementary material for: Associations of occupational and leisure-time physical activity with all-cause mortality: an individual participant data meta-analysis
Source: HighWire-hosted journal article supplement (doi:10.1136/bjsports-2024-108117), 2024-09-10
Supplement: bjsports-2024-108117supp002_data_supplement.pdf [file bjsports-2024-108117supp002_data_supplement.pdf]

Appendix 2. Overview of harmonization criteria used for physical activity, resembling the Saltin-Grimby physical activity scales<sup>1</sup>. Occupational physical activity categories roughly indicate: mainly sitting work (sedentary), work that mainly involves standing or walking, without lifting or carrying (low level), work that involves carrying light objects or walking stairs (moderate level), and physically demanding work involving frequent carrying or lifting heavy loads (high level). For leisure-time physical activity the categories roughly indicate: almost no regular physical activity, spending most leisure time sitting (sedentary), occasionally engaging in leisure-time activities such as slow walking or household activities (low level), engaging in activities such as brisk walking or dancing (moderate level), regular engagement in activities such as jogging or cycling (high level)

| Reference                | Study name          | Assessment                                                                                                                                                                                                                                                                                                                               | Leisure-time physical activity                                                                                                                                                                   |                                                                | Occupational physical activity                                                             |                                                                                                                                                                            |
|--------------------------|---------------------|------------------------------------------------------------------------------------------------------------------------------------------------------------------------------------------------------------------------------------------------------------------------------------------------------------------------------------------|--------------------------------------------------------------------------------------------------------------------------------------------------------------------------------------------------|----------------------------------------------------------------|--------------------------------------------------------------------------------------------|----------------------------------------------------------------------------------------------------------------------------------------------------------------------------|
|                          |                     |                                                                                                                                                                                                                                                                                                                                          | Original variable                                                                                                                                                                                | Harmonized                                                     | Original variable                                                                          | Harmonized                                                                                                                                                                 |
| Clays, 2014 <sup>2</sup> | BELFIT study        | Occupational physical activity was assessed with a specific questionnaire, asking about attitudes, movement and postures in a regular working day. Leisure-time physical activity was assessed with the Minnesota Leisure Time Physical Activity Questionnaires. Results from both questionnaires were expressed in caloric expenditure. | Leisure-time physical activity in kcal accumulated in the last 12 months, calculated into MET-hrs/week. Using quartiles to categorise continuous variable into sedentary, low, moderate and high | Sedentary<br>Mean (SD):<br>2.3 (2.3),<br>range: [0.0<br>6.7]   | Occupational physical activity in kcal/working hour                                        | White collar occupations were determined as sedentary, tertiles were taken from remaining occupations to categorise low, moderate and high occupational physical activity. |
|                          |                     |                                                                                                                                                                                                                                                                                                                                          |                                                                                                                                                                                                  | Low<br>Mean (SD):<br>11.6 (3.2),<br>range: [6.8<br>17.5]       |                                                                                            |                                                                                                                                                                            |
|                          |                     |                                                                                                                                                                                                                                                                                                                                          |                                                                                                                                                                                                  | Moderate<br>Mean (SD):<br>25.1 (4.7),<br>range: [17.5<br>34.6] |                                                                                            |                                                                                                                                                                            |
|                          |                     |                                                                                                                                                                                                                                                                                                                                          |                                                                                                                                                                                                  | High<br>Mean (SD):<br>60.3 (25.2),<br>range: [34.6<br>186.9]   |                                                                                            |                                                                                                                                                                            |
| Saidj, 2013 <sup>3</sup> | Health 2006 (H2006) | Physical activity (at work and during leisure-time) assessed with two items from the questionnaire developed by Saltin & Grimby <sup>27</sup> was analysed for the purpose of this meta-analysis. This is in contrast to the PAS2                                                                                                        | Mainly sedentary                                                                                                                                                                                 | Sedentary                                                      | Mainly sedentary                                                                           | Sedentary                                                                                                                                                                  |
|                          |                     |                                                                                                                                                                                                                                                                                                                                          | Some low to moderate physical activity – e.g., walking/biking at least 4 hours per week                                                                                                          | Low                                                            | Some standing, walking (e.g., kitchen, light industrial work, teaching – no heavy lifting) | Low                                                                                                                                                                        |
|                          |                     |                                                                                                                                                                                                                                                                                                                                          | Sports and exercise or equivalent heavy                                                                                                                                                          | Moderate                                                       | Mainly walking, stairclimbing, some lifting                                                | Moderate                                                                                                                                                                   |

|                           |                |                                                                                                                                                                                                     |                                                                                                                                 |                                                               |                                                                                                                                            |                                                          |
|---------------------------|----------------|-----------------------------------------------------------------------------------------------------------------------------------------------------------------------------------------------------|---------------------------------------------------------------------------------------------------------------------------------|---------------------------------------------------------------|--------------------------------------------------------------------------------------------------------------------------------------------|----------------------------------------------------------|
|                           |                | questionnaire that was reported on in the Saidj et al. (2013) paper.                                                                                                                                | gardening etc. at least 3 times per week                                                                                        |                                                               |                                                                                                                                            |                                                          |
|                           |                |                                                                                                                                                                                                     | Competitive sports/long distance running/athletics several times per week                                                       | High                                                          | Strenuous physical work                                                                                                                    | High                                                     |
| Sjørl, 2003 <sup>4</sup>  | MONICA Denmark | Occupational and leisure-time physical activity were assessed using single questions with four outcome categories.                                                                                  | Sedentary: almost completely inactive, e.g., reading, watching TV, going to movie.                                              | Sedentary                                                     | Sedentary: predominantly sedentary: e.g., desk worker, watch-maker, seated assembly-line worker (light goods).                             | Sedentary                                                |
|                           |                |                                                                                                                                                                                                     | Moderate active: some physical activity during at least 4h per week, e.g., walking, bicycling, or skiing, gardening.            | Low                                                           | Moderate active: mainly sitting or standing, some walking, e.g., cashier, general office worker, light tool and machinery worker, foreman. | Low                                                      |
|                           |                |                                                                                                                                                                                                     | Highly active: Regular activity at least 3h a week, e.g., heavy gardening, running, calisthenics, tennis etc.                   | Moderate                                                      | Highly active: walking, some handling of material, e.g., post-man waiter, construction worker, heavy tool and machinery worker.            | Moderate                                                 |
|                           |                |                                                                                                                                                                                                     | Sports: Regular hard physical training for competition in running events, soccer, European handball, etc. several times a week. | High                                                          | Heavy manual work: e.g., lumberjack, dockworker, stone mason and farm worker, ditch digger.                                                | High                                                     |
| Krause, 2017 <sup>5</sup> | KIHD study     | Occupational physical activity was assessed with interviews in which participants were asked about their activities during a regular workday. Leisure-time physical activity was assessed using the | Total leisure-time physical activity (MET-hrs/year), with a 7d recall. Using quartiles to categorise continuous                 | Sedentary<br>Mean (SD):<br>7.3 (3.9),<br>range: [0.0<br>13.4] | Relative aerobic workload defined as %VO <sub>2</sub> max. Using quartiles to categorise continuous variable into                          | Sedentary<br>Mean (SD): 18.2 (2.4), range: [9.9<br>21.6] |
|                           |                |                                                                                                                                                                                                     |                                                                                                                                 | Low                                                           |                                                                                                                                            | Low                                                      |

|                                                    |                    |                                                                                                                                                                                    |                                                                                                                                                      |                                                    |                                                  |                                                    |
|----------------------------------------------------|--------------------|------------------------------------------------------------------------------------------------------------------------------------------------------------------------------------|------------------------------------------------------------------------------------------------------------------------------------------------------|----------------------------------------------------|--------------------------------------------------|----------------------------------------------------|
|                                                    |                    | Minnesota Leisure Time Physical Activity Questionnaire.                                                                                                                            | variable into sedentary, low, moderate and high                                                                                                      | Mean (SD): 19.2 (3.4), range: [13.4 25.2]          | sedentary, low, moderate and high                | Mean (SD): 24.7 (1.8), range: [21.7 28.0]          |
|                                                    |                    |                                                                                                                                                                                    |                                                                                                                                                      | Moderate Mean (SD): 33.0 (4.8), range: [25.2 41.7] |                                                  | Moderate Mean (SD): 32.4 (2.8), range: [28.0 37.5] |
|                                                    |                    |                                                                                                                                                                                    |                                                                                                                                                      | High Mean (SD): 71.4 (36.6), range: [41.7 472.7]   |                                                  | High Mean (SD): 49.4 (12.3), range: [37.0 119.0]   |
| Pulsford, 2015 <sup>6</sup>                        | Whitehall II study | Leisure-time physical activity was assessed using the Minnesota Leisure Time Physical Activity Questionnaire. Occupational physical activity was obtained from job classification. | Mild, moderate and vigorous physical activity (MET-hrs/wk). Using quartiles to categorise continuous variable into sedentary, low, moderate and high | Sedentary Mean (SD): 14.4 (5.1), range: [0.0 21.5] | Professional / intermediate / non-manual skilled | Sedentary                                          |
|                                                    |                    |                                                                                                                                                                                    |                                                                                                                                                      |                                                    | -                                                | Low                                                |
|                                                    |                    |                                                                                                                                                                                    |                                                                                                                                                      |                                                    | Manual skilled / semi-skilled / unskilled        | Moderate                                           |
|                                                    |                    |                                                                                                                                                                                    |                                                                                                                                                      |                                                    | -                                                | High                                               |
|                                                    |                    |                                                                                                                                                                                    |                                                                                                                                                      | Low Mean (SD): 26.6 (2.9), range: [21.5 31.6]      |                                                  |                                                    |
| Moderate Mean (SD): 37.7 (3.7), range: [31.6 44.7] |                    |                                                                                                                                                                                    |                                                                                                                                                      |                                                    |                                                  |                                                    |
| High Mean (SD): 60.3 (14.5),                       |                    |                                                                                                                                                                                    |                                                                                                                                                      |                                                    |                                                  |                                                    |

|                               |                      |                                                                                                                                                                                                                                                                                                                                                                                                                                                                                                                                                                                                                                                                                                                                                                 |                                                                                                                                              |                                                              |                                              |           |
|-------------------------------|----------------------|-----------------------------------------------------------------------------------------------------------------------------------------------------------------------------------------------------------------------------------------------------------------------------------------------------------------------------------------------------------------------------------------------------------------------------------------------------------------------------------------------------------------------------------------------------------------------------------------------------------------------------------------------------------------------------------------------------------------------------------------------------------------|----------------------------------------------------------------------------------------------------------------------------------------------|--------------------------------------------------------------|----------------------------------------------|-----------|
|                               |                      |                                                                                                                                                                                                                                                                                                                                                                                                                                                                                                                                                                                                                                                                                                                                                                 |                                                                                                                                              | range: [44.7<br>146.2]                                       |                                              |           |
| Eaton, 1995 <sup>7</sup>      | IIHDS study          | Participants were interviewed regarding their occupational and leisure-time physical activity, with answer options into four outcome categories.                                                                                                                                                                                                                                                                                                                                                                                                                                                                                                                                                                                                                | Almost no daily physical activity                                                                                                            | Sedentary                                                    | Sit or drive                                 | Sedentary |
|                               |                      |                                                                                                                                                                                                                                                                                                                                                                                                                                                                                                                                                                                                                                                                                                                                                                 | Low-to-moderate but not daily physical activity                                                                                              | Low                                                          | Stand (including all the teachers)           | Low       |
|                               |                      |                                                                                                                                                                                                                                                                                                                                                                                                                                                                                                                                                                                                                                                                                                                                                                 | Light intensity daily physical activity such as a daily walk of 3 km                                                                         | Low                                                          | Walk (postmen, jail wardens and many more)   | Moderate  |
|                               |                      |                                                                                                                                                                                                                                                                                                                                                                                                                                                                                                                                                                                                                                                                                                                                                                 | Moderate-to-heavy daily physical exertion (swimming, gardening, etc.)                                                                        | Moderate                                                     | Manual labour                                | High      |
| Autenrieth, 2011 <sup>8</sup> | MONICA/KORA Augsburg | The MOSPA questionnaire was used to assess different domains of physical activity, asking participants to report the time usually spent on being physically active during work, transportation (walking or biking), household and/or leisure time, during a normal week over the past year. Based upon the subjects' indications, metabolic equivalents (METs, expressed in minutes per week) were calculated by means of a standardized program derived from the Compendium of Physical Activities and provided by the Centers for Disease Control and Prevention (CDC). For the present analysis, METs were only used for leisure-time physical activity. Occupational physical activity was graded on a four point scale based on participants' self-report. | Total leisure-time physical activity (MET-mins/wk). Using quartiles to categorise continuous variable into sedentary, low, moderate and high | Sedentary<br>Mean (SD):<br>2.6 (2.4),<br>range: [0.0<br>6.7] | No noteworthy occupational physical activity | Sedentary |
|                               |                      |                                                                                                                                                                                                                                                                                                                                                                                                                                                                                                                                                                                                                                                                                                                                                                 |                                                                                                                                              |                                                              | Low occupational physical activity           | Low       |
|                               |                      |                                                                                                                                                                                                                                                                                                                                                                                                                                                                                                                                                                                                                                                                                                                                                                 |                                                                                                                                              |                                                              | Moderate occupational physical activity      | Moderate  |
|                               |                      |                                                                                                                                                                                                                                                                                                                                                                                                                                                                                                                                                                                                                                                                                                                                                                 |                                                                                                                                              |                                                              | Heavy occupational physical activity         | High      |
|                               |                      |                                                                                                                                                                                                                                                                                                                                                                                                                                                                                                                                                                                                                                                                                                                                                                 | Low<br>Mean (SD):<br>12.0 (3.2),<br>range: [6.7<br>18.0]                                                                                     |                                                              |                                              |           |
|                               |                      |                                                                                                                                                                                                                                                                                                                                                                                                                                                                                                                                                                                                                                                                                                                                                                 | Moderate<br>Mean (SD):<br>26.9 (5.5),<br>range: [18.0<br>38.2]                                                                               |                                                              |                                              |           |
|                               |                      |                                                                                                                                                                                                                                                                                                                                                                                                                                                                                                                                                                                                                                                                                                                                                                 | High<br>Mean (SD):<br>75.3 (46.1),                                                                                                           |                                                              |                                              |           |

|                                 |                             |                                                                                                                                                                                                                                                                                                                                                            |                                                                                                                                                                           |                        |                                                                                                                                                                                                                                                          |                                                           |
|---------------------------------|-----------------------------|------------------------------------------------------------------------------------------------------------------------------------------------------------------------------------------------------------------------------------------------------------------------------------------------------------------------------------------------------------|---------------------------------------------------------------------------------------------------------------------------------------------------------------------------|------------------------|----------------------------------------------------------------------------------------------------------------------------------------------------------------------------------------------------------------------------------------------------------|-----------------------------------------------------------|
|                                 |                             |                                                                                                                                                                                                                                                                                                                                                            |                                                                                                                                                                           | range: [38.2<br>490.0] |                                                                                                                                                                                                                                                          |                                                           |
| Rosengren,<br>1997 <sup>9</sup> | Primary Prevention<br>Study | Occupational and leisure-time<br>physical activity was graded on a<br>four point scale                                                                                                                                                                                                                                                                     | Mainly sedentary (e.g.,<br>reading or watching<br>television)                                                                                                             | Sedentary              | Mainly sedentary                                                                                                                                                                                                                                         | Sedentary                                                 |
|                                 |                             |                                                                                                                                                                                                                                                                                                                                                            | Moderate activity (e.g.,<br>walking, riding a bicycle,<br>light garden work at least<br>4 hours per week)                                                                 | Low                    | Predominantly walking<br>on one level but no<br>heavy lifting                                                                                                                                                                                            | Low                                                       |
|                                 |                             |                                                                                                                                                                                                                                                                                                                                                            | Regular exercise (e.g.,<br>running, swimming,<br>tennis, heavy gardening<br>at least 2 to 3 hours per<br>week)                                                            | Moderate               | Mainly walking,<br>including climbing stairs,<br>or walking uphill or<br>lifting heavy objects                                                                                                                                                           | Moderate                                                  |
|                                 |                             |                                                                                                                                                                                                                                                                                                                                                            | Athletic training or<br>participation in<br>competitive sports<br>regularly and several<br>times per week                                                                 | High                   | Heavy physical labour                                                                                                                                                                                                                                    | High                                                      |
| Richard,<br>2015 <sup>10*</sup> | NHANES study                | IPAQ questionnaire to assess<br>physical activity. Single item<br>question to assess occupational<br>physical activity (in the 2005-2006<br>wave). Classification scheme<br>according to profession and using<br>Ainsworth tables <sup>1</sup> to assess<br>occupational physical activity<br>(only in the 2007-2008, 2009-2010<br>and 2011 and 2012 wave) | Leisure-time physical<br>activity items were used<br>to assess METs. Using<br>quartiles to categorise<br>continuous variable into<br>sedentary, low, moderate<br>and high | Sedentary              | Professions were<br>expressed in MET<br>according to Ainsworth<br>tables <sup>1</sup> . Using quartiles<br>to categorise continuous<br>variable into sedentary,<br>low, moderate and high<br>(in the 2007-2008, 2009-<br>2010 and 2011 and 2012<br>wave) | Sedentary<br>Mean (SD): 1.7<br>(0.1), range: [1.5<br>1.8] |
|                                 |                             |                                                                                                                                                                                                                                                                                                                                                            |                                                                                                                                                                           | Low                    |                                                                                                                                                                                                                                                          | Low<br>Mean (SD): 2.2<br>(0.2), range: [2.0<br>2.5]       |
|                                 |                             |                                                                                                                                                                                                                                                                                                                                                            |                                                                                                                                                                           | Moderate               |                                                                                                                                                                                                                                                          | Moderate<br>Mean (SD): 2.5<br>(0.0), range: [2.5<br>2.6]  |
|                                 |                             |                                                                                                                                                                                                                                                                                                                                                            |                                                                                                                                                                           | High                   |                                                                                                                                                                                                                                                          | High<br>Mean (SD): 3.4<br>(0.6), range: [2.7<br>4.3]      |
| Moe, 2013 <sup>11</sup>         | HUNT study                  |                                                                                                                                                                                                                                                                                                                                                            | None                                                                                                                                                                      | Sedentary              | Mostly sedentary work                                                                                                                                                                                                                                    | Sedentary                                                 |

|                             |                   |                                                                                                                                                                                                                                                                                           |                                                                                                                          |                                                              |                                                                                                                                        |                                                        |
|-----------------------------|-------------------|-------------------------------------------------------------------------------------------------------------------------------------------------------------------------------------------------------------------------------------------------------------------------------------------|--------------------------------------------------------------------------------------------------------------------------|--------------------------------------------------------------|----------------------------------------------------------------------------------------------------------------------------------------|--------------------------------------------------------|
|                             |                   | Occupational and leisure-time physical activity were assessed using questions (one question for leisure-time physical activity and two for occupational physical activity) with four outcome categories                                                                                   | Less than 1 hour                                                                                                         | Low                                                          | Much walking at work                                                                                                                   | Low                                                    |
|                             |                   |                                                                                                                                                                                                                                                                                           | 1-2 hours                                                                                                                | Moderate                                                     | Much walking or lifting at work                                                                                                        | Moderate                                               |
|                             |                   |                                                                                                                                                                                                                                                                                           | 3 hours or more                                                                                                          | High                                                         | Heavy physical work                                                                                                                    | High                                                   |
| Franzon, 2015 <sup>12</sup> | ULSAM study       | Occupational and leisure-time physical activity were assessed with a single question with four outcome categories                                                                                                                                                                         | Sedentary                                                                                                                | Sedentary                                                    | Chiefly sedentary                                                                                                                      | Sedentary                                              |
|                             |                   |                                                                                                                                                                                                                                                                                           | Moderate                                                                                                                 | Low                                                          | Mostly standing or walking                                                                                                             | Low                                                    |
|                             |                   |                                                                                                                                                                                                                                                                                           | Regular                                                                                                                  | Moderate                                                     | Heavy lifting (>10kg)                                                                                                                  | Moderate                                               |
|                             |                   |                                                                                                                                                                                                                                                                                           | Athletic                                                                                                                 | High                                                         | Physically demanding work                                                                                                              | High                                                   |
| Huerta, 2016 <sup>13</sup>  | EPIC Spain study  | EPIC-PAQ questionnaire was used to assess occupational and leisure-time physical activity. Occupational physical activity was classified into four categories, leisure-time physical activity was MET-hrs/week and then categorised into four outcome categories using WHO cut-off values | <7,5 MET-hrs/week                                                                                                        | Sedentary                                                    | -                                                                                                                                      | Sedentary                                              |
|                             |                   |                                                                                                                                                                                                                                                                                           | 7,5-15 MET-hrs/week                                                                                                      | Low                                                          | Sedentary                                                                                                                              | Low                                                    |
|                             |                   |                                                                                                                                                                                                                                                                                           | 15-30 MET-hrs/week                                                                                                       | Moderate                                                     | -                                                                                                                                      | Moderate                                               |
|                             |                   |                                                                                                                                                                                                                                                                                           | >=30 MET-hrs/week                                                                                                        | High                                                         | Non-sedentary                                                                                                                          | High                                                   |
| Johnsen, 2016 <sup>14</sup> | WOLF study        | Both occupational and leisure-time physical activity were measured with few questions, categorising participants in four physical activity categories                                                                                                                                     | Never exercise                                                                                                           | Sedentary                                                    | Very, very light                                                                                                                       | Sedentary                                              |
|                             |                   |                                                                                                                                                                                                                                                                                           | Very little exercise. Take occasional walks.                                                                             | Low                                                          | Very light / Quite light                                                                                                               | Low                                                    |
|                             |                   |                                                                                                                                                                                                                                                                                           | Exercise now and then                                                                                                    | Moderate                                                     | Somewhat strenuous / Strenuous                                                                                                         | Moderate                                               |
|                             |                   |                                                                                                                                                                                                                                                                                           | Exercise regularly                                                                                                       | High                                                         | Very strenuous / Very, very strenuous                                                                                                  | High                                                   |
| Bahls, 2018 <sup>15</sup>   | SHIP-START1 study | Baecke questionnaire with 16 questions from different domains of physical activity, expressing physical activity in arbitrary units, was used                                                                                                                                             | Arbitrary leisure-time physical activity units with values ranging from 1 to 5. Using quartiles to categorise continuous | Sedentary<br>Mean (SD):<br>2.1 (0.2),<br>range: [1.1<br>2.4] | Arbitrary occupational physical activity units with values ranging from 1 to 5. Using quartiles to categorise continuous variable into | Sedentary<br>Mean (SD): 1.8 (0.2),<br>range: [1.0 2.1] |
|                             |                   |                                                                                                                                                                                                                                                                                           |                                                                                                                          | Low                                                          |                                                                                                                                        | Low                                                    |

|                           |             |                                                                                                                                               |                                                                                                                                                                          |                                                  |                                                                                                                                                                          |                                                  |
|---------------------------|-------------|-----------------------------------------------------------------------------------------------------------------------------------------------|--------------------------------------------------------------------------------------------------------------------------------------------------------------------------|--------------------------------------------------|--------------------------------------------------------------------------------------------------------------------------------------------------------------------------|--------------------------------------------------|
|                           |             |                                                                                                                                               | variable into sedentary, low, moderate and high                                                                                                                          | Mean (SD): 2.6 (0.1), range: [2.5 2.7]           | sedentary, low, moderate and high                                                                                                                                        | Mean (SD): 2.5 (0.1), range: [2.3 2.7]           |
|                           |             |                                                                                                                                               |                                                                                                                                                                          | Moderate Mean (SD): 3.0 (0.1), range: [2.9 3.1]  |                                                                                                                                                                          | Moderate Mean (SD): 3.1 (0.2), range: [2.9 3.4]  |
|                           |             |                                                                                                                                               |                                                                                                                                                                          | High Mean (SD): 3.5 (0.3), range: [3.3 4.6]      |                                                                                                                                                                          | High Mean (SD): 3.9 (0.3), range: [3.6 4.9]      |
| Bahls, 2018 <sup>15</sup> | CARLA study | Baecke questionnaire with 16 questions from different domains of physical activity, expressing physical activity in arbitrary units, was used | Arbitrary leisure-time physical activity units with values ranging from 1 to 5. Using quartiles to categorise continuous variable into sedentary, low, moderate and high | Sedentary Mean (SD): 2.0 (0.2), range: [1.3 2.3] | Arbitrary occupational physical activity units with values ranging from 1 to 5. Using quartiles to categorise continuous variable into sedentary, low, moderate and high | Sedentary Mean (SD): 1.8 (0.2), range: [1.3 2.0] |
|                           |             |                                                                                                                                               |                                                                                                                                                                          | Low Mean (SD): 2.5 (0.1), range: [2.4 2.6]       |                                                                                                                                                                          | Low Mean (SD): 2.3 (0.1), range: [2.1 2.5]       |
|                           |             |                                                                                                                                               |                                                                                                                                                                          | Moderate Mean (SD): 2.9 (0.1), range: [2.7 3.1]  |                                                                                                                                                                          | Moderate Mean (SD): 2.9 (0.2), range: [2.6 3.3]  |
|                           |             |                                                                                                                                               |                                                                                                                                                                          | High Mean (SD): 3.5 (0.3), range: [3.3 4.6]      |                                                                                                                                                                          | High Mean (SD): 3.7 (0.3), range: [3.4 4.5]      |
|                           |             |                                                                                                                                               | -                                                                                                                                                                        | Sedentary                                        | Mostly sitting                                                                                                                                                           | Sedentary                                        |

|                              |                                          |                                                                                                                                                                                                                                                                                                                |                                                                                                                   |           |                                                                                   |           |
|------------------------------|------------------------------------------|----------------------------------------------------------------------------------------------------------------------------------------------------------------------------------------------------------------------------------------------------------------------------------------------------------------|-------------------------------------------------------------------------------------------------------------------|-----------|-----------------------------------------------------------------------------------|-----------|
| Wanner, 2014 <sup>16</sup>   | The Swiss MONICA study                   | Single questions were used to assess occupational (4 outcome categories) and leisure-time physical activity (3 outcome categories)                                                                                                                                                                             | Light intensity physical activity, mostly sedentary                                                               | Low       | Mostly standing and walking frequently, but not lifting or carrying heavy objects | Low       |
|                              |                                          |                                                                                                                                                                                                                                                                                                                | Frequent walking/cycling; other frequent activities (e.g., gardening)                                             | Moderate  | Often having to take stairs and carrying light objects                            | Moderate  |
|                              |                                          |                                                                                                                                                                                                                                                                                                                | Regular vigorous physical activity                                                                                | High      | A lot of physical effort and frequently carrying heavy objects                    | High      |
| Wanner, 2014 <sup>16</sup>   | NRP 1A study                             | Single questions were used to assess occupational (4 outcome categories) and leisure-time physical activity (3 outcome categories). Those without work were excluded from the OPA assessment                                                                                                                   | -                                                                                                                 | Sedentary | Sedentary (taking stairs of <5 floors or walking <800m per day)                   | Sedentary |
|                              |                                          |                                                                                                                                                                                                                                                                                                                | Sedentary                                                                                                         | Low       | -                                                                                 | Low       |
|                              |                                          |                                                                                                                                                                                                                                                                                                                | Medium (walking, cycling, gardening, dancing, gymnastics, table tennis, badminton, skiing)                        | Moderate  | Medium (taking stairs of 5 to 20 floors or walking 800m to 3km per day at work)   | Moderate  |
| Petersen, 2012 <sup>17</sup> | Danish National Health Interview Surveys | Occupational physical activity was estimated from the self-administrated questionnaire by the question: "Which description most precisely covers your level of physical activity at work?" Participants were asked to state their typical level of physical activity in leisure time during the last 12 months | sedentary activities (reading, TV-watching or other sedentary activities)                                         | Sedentary | Mainly sedentary work                                                             | Sedentary |
|                              |                                          |                                                                                                                                                                                                                                                                                                                | low physical activity (walking, bicycling or other light intensity activities for a minimum of four hours a week) | Low       | Work that require quite a bit of standing or walking activities                   | Low       |
|                              |                                          |                                                                                                                                                                                                                                                                                                                | moderate physical activity (exercise, endurance training or                                                       | Moderate  | Standing and walking most of the time with                                        | Moderate  |



|                                |                             |                                                                                                                                                                                                                          |                                                                                                                                                                   |           |                                                                                                                      |           |
|--------------------------------|-----------------------------|--------------------------------------------------------------------------------------------------------------------------------------------------------------------------------------------------------------------------|-------------------------------------------------------------------------------------------------------------------------------------------------------------------|-----------|----------------------------------------------------------------------------------------------------------------------|-----------|
|                                |                             |                                                                                                                                                                                                                          | heavy gardening for at least four hours a week)                                                                                                                   |           | quite a bit of carrying or lifting heavy burdens                                                                     |           |
|                                |                             |                                                                                                                                                                                                                          | vigorous physical activity (strenuous activities usually involving competition or endurance training performed regularly or several times a week)                 | High      | Work that requires vigorous or strenuous physical activity                                                           | High      |
| Dalene, 2021 <sup>18</sup>     | Norwegian study             | Occupational and leisure-time physical activity was assessed by the <i>Saltin-Grimby Physical Activity Level Scale</i>                                                                                                   | Reading, watching television, or engaging in sedentary activities                                                                                                 | Sedentary | Mostly sedentary work (e.g., desk work, work including assembling of minor parts)                                    | Sedentary |
|                                |                             |                                                                                                                                                                                                                          | At least 4 hours a week walking, bicycling, or engaging in other types of physical activity                                                                       | Low       | Work characterized by some walking (e.g., light industrial work, non-sedentary office work, inspection and the like) | Low       |
|                                |                             |                                                                                                                                                                                                                          | At least 4 hours a week exercising to keep fit and participating in recreational athletics                                                                        | Moderate  | Work characterized by walking and lifting (e.g., mail delivery and construction work)                                | Moderate  |
|                                |                             |                                                                                                                                                                                                                          | Regular, vigorous training or participating in competitive sports several times a week                                                                            | High      | Work characterized by heavy manual labour (for example, work including digging and shovelling)                       | High      |
| Holtermann, 2012 <sup>19</sup> | Copenhagen City Heart Study | A single question with four categories was used for self-reporting leisure-time and occupational physical activity. For occupational physical activity 'Which description most precisely covers your pattern of physical | Being almost entirely sedentary (e.g., reading, watching television or movies, engaging in light intensity physical activity such as walking or biking <2 h/week) | Sedentary | Predominantly sedentary work                                                                                         | Sedentary |

|                                |                                     |                                                                                                                                                                                                                                                                                                                                                                                                                                                            |                                                                                                                                                                                                                  |           |                                               |           |
|--------------------------------|-------------------------------------|------------------------------------------------------------------------------------------------------------------------------------------------------------------------------------------------------------------------------------------------------------------------------------------------------------------------------------------------------------------------------------------------------------------------------------------------------------|------------------------------------------------------------------------------------------------------------------------------------------------------------------------------------------------------------------|-----------|-----------------------------------------------|-----------|
|                                |                                     | activity at work? For leisure time physical activity: 'Which description most precisely covers your pattern of physical activity during leisure time?                                                                                                                                                                                                                                                                                                      | Engaging in light intensity physical activity for 2-4 h/week.                                                                                                                                                    | Low       | Sedentary or standing, sometimes walking work | Low       |
|                                |                                     |                                                                                                                                                                                                                                                                                                                                                                                                                                                            | Engaging in light intensity physical activity for more than 4 h/week or more vigorous activity for 2-4 h/week (e.g., brisk walking, fast biking, heavy gardening, sports that cause perspiration or exhaustion). | Moderate  | Walking, sometimes lifting work               | Moderate  |
|                                |                                     |                                                                                                                                                                                                                                                                                                                                                                                                                                                            | Engaging in highly vigorous physical activity for more than 4 h/week or regular heavy exercise or competitive sports several times per week.                                                                     | High      | Heavy manual work                             | High      |
| Holtermann, 2021 <sup>20</sup> | Copenhagen General Population Study | Participants self-reported their occupational and leisure time physical activity, from an earlier used questionnaire. Occupational physical activity was quantitated using the following question: Which description most precisely covers your pattern of physical activity at work? Leisure time physical activity was quantitated by the following question: Which description most precisely covers your pattern of physical activity at leisure time? | You are mainly sedentary, e.g., you read, watch television, go to the cinema. In general, you spend most of your leisure time performing sedentary tasks.                                                        | Sedentary | Predominantly sedentary work                  | Sedentary |
|                                |                                     |                                                                                                                                                                                                                                                                                                                                                                                                                                                            | You go for a walk, use your bicycle a little or perform activity for at least 4 hours per week, e.g., light gardening, leisure-time building activity, table tennis and bowling.                                 | Low       | Sedentary or standing, sometimes walking work | Low       |
|                                |                                     |                                                                                                                                                                                                                                                                                                                                                                                                                                                            | You are an active athlete, run, play tennis or badminton for at least 3                                                                                                                                          | Moderate  | Walking, sometimes lifting work               | Moderate  |

|                                |                       |                                                                                                                                                                                                                                                                                                                                                                                                                  |                                                                                                                                                                                                                                  |           |                                                                                                                                                                                                                            |           |
|--------------------------------|-----------------------|------------------------------------------------------------------------------------------------------------------------------------------------------------------------------------------------------------------------------------------------------------------------------------------------------------------------------------------------------------------------------------------------------------------|----------------------------------------------------------------------------------------------------------------------------------------------------------------------------------------------------------------------------------|-----------|----------------------------------------------------------------------------------------------------------------------------------------------------------------------------------------------------------------------------|-----------|
|                                |                       |                                                                                                                                                                                                                                                                                                                                                                                                                  | hours/week. If you frequently perform heavy gardening, you also belong to this group.                                                                                                                                            |           |                                                                                                                                                                                                                            |           |
|                                |                       |                                                                                                                                                                                                                                                                                                                                                                                                                  | You take part in competitive sports, swim, play European football, handball or run long distances regularly several times per week.                                                                                              | High      | Heavy manual work                                                                                                                                                                                                          | High      |
| Holtermann, 2009 <sup>21</sup> | Copenhagen male study | Occupational physical activity at work was estimated by the question: "Which description most precisely covers your pattern of physical activity at work?" To assess leisure-time physical activity the following question was asked "Which description most precisely covers your pattern of physical activity at leisure time?" Both questions had four answer options of which the highest two were combined. | -                                                                                                                                                                                                                                | Sedentary | -                                                                                                                                                                                                                          | Sedentary |
|                                |                       |                                                                                                                                                                                                                                                                                                                                                                                                                  | You are mainly sedentary, for example, you read, watch television, go to the cinema. In general you spend most of your leisure time performing sedentary tasks                                                                   | Low       | You are mainly sedentary and do not walk much around at your workplace, e.g., desk work, and work including assembling of minor parts                                                                                      | Low       |
|                                |                       |                                                                                                                                                                                                                                                                                                                                                                                                                  | You go for a walk, use your bicycle a little or perform activity for at least 4 hours per week, for example, light gardening, leisure-time building activity, table tennis and bowling                                           | Moderate  | You walk around quite a bit at your workplace but do <b>not</b> have to carry heavy items, e.g., light industrial work, non-sedentary office work, inspection and the like                                                 | Moderate  |
|                                |                       |                                                                                                                                                                                                                                                                                                                                                                                                                  | You are an active athlete, run, play tennis or badminton for at least 3 hours/week. If you frequently perform heavy gardening, you also belong to this group. You take part in competitive sports, swim, play European football, | High      | Most of the time you walk, and you often have to walk up stairs and lift various items. Examples include mail delivery and construction work. You do heavy physical work. You carry heavy burdens and carry out physically | High      |

|                                                                                                                                                                                                                                                                                                                                                                                                                                                                                                                                                                                                                                                           |  |  |                                                                 |  |                                                             |  |
|-----------------------------------------------------------------------------------------------------------------------------------------------------------------------------------------------------------------------------------------------------------------------------------------------------------------------------------------------------------------------------------------------------------------------------------------------------------------------------------------------------------------------------------------------------------------------------------------------------------------------------------------------------------|--|--|-----------------------------------------------------------------|--|-------------------------------------------------------------|--|
|                                                                                                                                                                                                                                                                                                                                                                                                                                                                                                                                                                                                                                                           |  |  | handball or run long distances regularly several times per week |  | strenuous work, e.g., work including digging and shovelling |  |
| <p><sup>1</sup>Ainsworth et al. 2011 Compendium of Physical Activities: a second update of codes and MET values. <i>Med Sci Sports Exerc.</i> 2011; 43(8):1575-81.<br/>MET = Metabolic equivalent of task</p> <p>* Although a reference is made to the paper by Richard and colleagues (which is the only paper we identified on the topic using NHANES data), different measurement waves were included for our meta-analysis. Measurements of the following waves were used in which all dependent and confounding variables were assessed: 2005-2006, 2007-2008, 2009-2010, and 2011-2012. For outcomes the 2015 follow-up measurements were used.</p> |  |  |                                                                 |  |                                                             |  |

**References**

1. Saltin B, Grimby G. Physiological analysis of middle-aged and old former athletes. Comparison with still active athletes of the same ages. *Circulation* 1968 38(6):1104-15. doi: 10.1161/01.cir.38.6.1104
2. Clays E, Lidegaard M, De Bacquer D, et al. The combined relationship of occupational and leisure-time physical activity with all-cause mortality among men, accounting for physical fitness. *American journal of epidemiology* 2014;179(5):559-66. doi: 10.1093/aje/kwt294
3. Saidj M, Jorgensen T, Jacobsen RK, et al. Separate and joint associations of occupational and leisure-time sitting with cardio-metabolic risk factors in working adults: a cross-sectional study. *PLoS one* 2013;8(8):e70213. doi: 10.1371/journal.pone.0070213
4. Sjørl A, Thomsen KK, Schroll M, Andersen LB. Secular trends in acute myocardial infarction in relation to physical activity in the general Danish population. *Scandinavian journal of medicine & science in sports* 2003;13(4):224-30.
5. Krause N, Arah OA, Kauhanen J. Physical activity and 22-year all-cause and coronary heart disease mortality. *American Journal of Industrial Medicine* 2017;60(11):976-90. doi: 10.1002/ajim.22756
6. Pulsford RM, Stamatakis E, Britton AR, et al. Associations of sitting behaviours with all-cause mortality over a 16-year follow-up: the Whitehall II study. *International journal of epidemiology* 2015;44(6):1909-16.
7. Eaton CB, Medalie JH, Flocke SA, et al. Self-reported physical activity predicts long-term coronary heart disease and all-cause mortalities. Twenty-one-year follow-up of the Israeli Ischemic Heart Disease Study. *Archives of family medicine* 1995;4(4):323-29.
8. Autenrieth CS, Baumert J, Baumeister SE, et al. Association between domains of physical activity and all-cause, cardiovascular and cancer mortality. *European journal of epidemiology* 2011;26(2):91-99. doi: 10.1007/s10654-010-9517-6
9. Rosengren A, Wilhelmsen L. Physical activity protects against coronary death and deaths from all causes in middle-aged men. Evidence from a 20-year follow-up of the primary prevention study in Goteborg. *Annals of Epidemiology* 1997;7(1):69-75.
10. Richard A, Martin B, Wanner M, et al. Effects of leisure-time and occupational physical activity on total mortality risk in NHANES III according to sex, ethnicity, central obesity, and age. *Journal of physical activity & health* 2015;12(2):184-92. doi: 10.1123/jpah.2013-0198
11. Moe B, Mork PJ, Holtermann A, Nilsen TI. Occupational physical activity, metabolic syndrome and risk of death from all causes and cardiovascular disease in the HUNT 2 cohort study. *Occupational and Environmental Medicine* 2013;70(2):86-90. doi: 10.1136/oemed-2012-100734
12. Franzon K, Zethelius B, Cederholm T, Kilander L. Modifiable midlife risk factors, independent aging, and survival in older men: report on long-term follow-up of the Uppsala Longitudinal Study of Adult Men cohort. *Journal of the American Geriatrics Society* 2015;63(5):877-85. doi: 10.1111/jgs.13352
13. Huerta JM, Chirlaque MD, Tormo MJ, et al. Work, household, and leisure-time physical activity and risk of mortality in the EPIC-Spain cohort. *Preventive medicine* 2016;85:106-12. doi: 10.1016/j.ypmed.2016.02.009
14. Johnsen AM, Alfredsson L, Knutsson A, et al. Association between occupational physical activity and myocardial infarction: a prospective cohort study. *BMJ Open* 2016;6(10):e012692. doi: 10.1136/bmjopen-2016-012692
15. Bahls M, Groß S, Baumeister SE, et al. Association of domain-specific physical activity and cardiorespiratory fitness with all-cause and cause-specific mortality in two population-based cohort studies. *Sci Rep* 2018;8(1):16066. doi: 10.1038/s41598-018-34468-7

16. Wanner M, Tarnutzer S, Martin BW, et al. Impact of different domains of physical activity on cause-specific mortality: a longitudinal study. *Preventive medicine* 2014;62:89-95. doi: 10.1016/j.ypmed.2014.01.025
17. Petersen CB, Eriksen L, Tolstrup JS, et al. Occupational heavy lifting and risk of ischemic heart disease and all-cause mortality. *BMC Public Health* 2012;12:1070. doi: 10.1186/1471-2458-12-1070
18. Dalene KE, Tarp J, Selmer RM, et al. Occupational physical activity and longevity: A prospective cohort study of 437 378 Norwegian working men and women. *Lancet Public Health* 2021;6(6):e386-e95. doi: 10.1016/S2468-2667(21)00032-3
19. Holtermann A, Marott JL, Gyntelberg F, et al. Occupational and leisure time physical activity: risk of all-cause mortality and myocardial infarction in the Copenhagen City Heart Study. A prospective cohort study. *BMJ Open* 2012;2(1):e000556. doi: 10.1136/bmjopen-2011-000556
20. Holtermann A, Schnohr P, Nordestgaard BG, Marott JL. The physical activity paradox in cardiovascular disease and all-cause mortality: the contemporary Copenhagen General Population Study with 104,046 adults. *European Heart Journal* 2021:ehab087. doi: 10.1093/eurheartj/ehab087
21. Holtermann A, Mortensen OS, Burr H, et al. The interplay between physical activity at work and during leisure time--risk of ischemic heart disease and all-cause mortality in middle-aged Caucasian men. *Scandinavian Journal of Work, Environment & Health* 2009;35(6):466-74.
