# Supplementary material for: Associations of occupational and leisure-time physical activity with all-cause mortality: an individual participant data meta-analysis
Source: HighWire-hosted journal article supplement (doi:10.1136/bjsports-2024-108117), 2024-09-10
Supplement: bjsports-2024-108117supp004_data_supplement.pdf [file bjsports-2024-108117supp004_data_supplement.pdf]

Appendix 4. Correlation of variables from the 17 studies that were combined in the individual participant dataset.

|                | <b>OPA</b> | <b>LTPA</b> | <b>Edu</b> | <b>Gender</b> | <b>Smoking</b> | <b>BMI</b> | <b>Age</b> |
|----------------|------------|-------------|------------|---------------|----------------|------------|------------|
| <b>OPA</b>     | 1          |             |            |               |                |            |            |
| <b>LTPA</b>    | 0.071      | 1           |            |               |                |            |            |
| <b>Edu</b>     | -0.293     | 0.136       | 1          |               |                |            |            |
| <b>Gender</b>  | 0.037      | 0.071       | 0.013      | 1             |                |            |            |
| <b>Smoking</b> | 0.067      | -0.127      | -0.133     | -0.041        | 1              |            |            |
| <b>BMI</b>     | 0.064      | -0.069      | -0.138     | -0.016        | -0.089         | 1          |            |
| <b>Age</b>     | -0.014     | -0.141      | -0.250     | -0.105        | 0.023          | 0.165      | 1          |

OPA = Occupational physical activity; LTPA = Leisure-time physical activity;  
Edu = Education level; BMI = Body mass index
