# Supplementary material for: Associations of occupational and leisure-time physical activity with all-cause mortality: an individual participant data meta-analysis
Source: HighWire-hosted journal article supplement (doi:10.1136/bjsports-2024-108117), 2024-09-10
Supplement: bjsports-2024-108117supp006_data_supplement.pdf [file bjsports-2024-108117supp006_data_supplement.pdf]

## Appendix 6. Excluded studies after contacting researchers.

| n  | Reference                                                                                                                                                                                                                                                                                                                                                                                                                                                                                                                 | Study name                                                                             | Reason for exclusion                                |
|----|---------------------------------------------------------------------------------------------------------------------------------------------------------------------------------------------------------------------------------------------------------------------------------------------------------------------------------------------------------------------------------------------------------------------------------------------------------------------------------------------------------------------------|----------------------------------------------------------------------------------------|-----------------------------------------------------|
| 1  | Graff-Iversen S, Selmer R, Sørensen M, Skurtveit S. Occupational physical activity, overweight, and mortality: a follow-up study of 47,405 Norwegian women and men. <i>Res Q Exerc Sport</i> , 2007; 78(3):151-161.                                                                                                                                                                                                                                                                                                       | -                                                                                      | Could not or did not want to collaborate            |
| 2  | Harari G, Green MS, Zelber-Sagi S. Combined association of occupational and leisure-time physical activity with all-cause and coronary heart disease mortality among a cohort of men followed-up for 22 years. <i>Occup Environ Med</i> , 2015; 72(9):617-624.                                                                                                                                                                                                                                                            | CORDIS study                                                                           | Could not or did not want to collaborate            |
| 3  | Etemadi A, Abnet CC, Kamangar F, Islami F, Khademi H, Pourshams A, Poustchi H, Bagheri M, Sohrabpour AA, Aliasgar A, Khoshnia M, Wacholder S, Matthews CC, Pharoah PD, Brennan P, Boffetta P, Malekzadeh R, Dawsey SM. Impact of body size and physical activity during adolescence and adult life on overall and cause-specific mortality in a large cohort study from Iran. <i>Eur J Epidemiol</i> , 2014; 29(2):95-109.                                                                                                | Golestan Cohort Study                                                                  | Could not or did not want to collaborate            |
| 4  | Lissner L, Bengtsson C, Björkelund C, Wedel H. Physical activity levels and changes in relation to longevity. A prospective study of Swedish women. <i>Am J Epidemiol</i> , 1996; 143(1):54-62.                                                                                                                                                                                                                                                                                                                           | Gothenburg Prospective Study of Women                                                  | Could not or did not want to collaborate            |
| 5  | Padyab M, Blomstedt Y, Norberg M. No association found between cardiovascular mortality, and job demands and decision latitude: experience from the Västerbotten Intervention Programme in Sweden. <i>Soc Sci Med</i> , 2014; 117:58-66.                                                                                                                                                                                                                                                                                  | Linnaeus database                                                                      | Could not or did not want to collaborate            |
| 6  | Lear SA, Hu W, Rangarajan S, Gasevic D, Leong D, Iqbal R, Casanova A, Swaminathan S, Anjana RM, Kumar R, Rosengren A, Wei L, Yang W, Chuangshi W, Huaxing L, Nair S, Diaz R, Swidon H, Gupta R, Mohammadifard N, Lopez-Jaramillo P, Oguz A, Zatonska K, Seron P, Avezum A, Poirier P, Teo K, Yusuf S. The effect of physical activity on mortality and cardiovascular disease in 130 000 people from 17 high-income, middle-income, and low-income countries: the PURE study. <i>Lancet</i> , 2017; 390(10113):2643-2654. | Prospective Urban Rural Epidemiologic (PURE) study with pooled data from 17 countries. | Could not or did not want to collaborate            |
| 7  | Kikuchi H, Inoue S, Odagiri Y, Inoue M, Sawada N, Tsugane S. Occupational sitting time and risk of all-cause mortality among Japanese workers. <i>Scand J Work Environ Health</i> , 2015; 41(6):519-528.                                                                                                                                                                                                                                                                                                                  | Japan Public Health Centre-based prospective study (JPHC study)                        | Could not or did not want to collaborate            |
| 8  | Dorn JP, Cerny FJ, Epstein LH, Naughton J, Vena JE, Winkelstein W, Schisterman E, Trevisan M. Work and leisure time physical activity and mortality in men and women from a general population sample. <i>Ann Epidemiol</i> , 1999; 9(6):366-373                                                                                                                                                                                                                                                                          | The Buffalo Blood Pressure Study                                                       | Could not or did not want to collaborate            |
| 9  | Hall C, Heck JE, Sandler DP, Ritz B, Chen H, Krause N. Occupational and leisure-time physical activity differentially predict 6-year incidence of stroke and transient ischemic attack in women. <i>Scand J Work Environ Health</i> . 2019; 45(3):267-279.                                                                                                                                                                                                                                                                | US sister study                                                                        | Could not or did not want to collaborate            |
| 10 | Holtermann A, Burr H, Hansen JV, Krause N, Søgaard K, Mortensen OS. Occupational physical activity and mortality among Danish workers. <i>Int Arch Occup Environ Health</i> , 2012; 85(3):305-310.                                                                                                                                                                                                                                                                                                                        | Danish Work Environment Cohort Study                                                   | Were not able to share individual participant data, |

|    |                                                                                                                                                                                                                                                                                                 |                                                                                                  |                                                                                                                  |
|----|-------------------------------------------------------------------------------------------------------------------------------------------------------------------------------------------------------------------------------------------------------------------------------------------------|--------------------------------------------------------------------------------------------------|------------------------------------------------------------------------------------------------------------------|
| 11 | Besson H, Ekelund U, Brage S, Luben R, Bingham S, Khaw KT, Wareham NJ. Relationship between subdomains of total physical activity and mortality. <i>Med Sci Sports Exerc</i> , 2008; 40(11):1909-1915.                                                                                          | European Prospective Investigation into Cancer (EPIC) study                                      | nor to conduct data analysis remotely<br>Were not able to share individual participant data, nor to conduct data |
| 12 | Chasland LC, Knuiman MW, Divitini ML, Chan YX, Handelsman DJ, Naylor LH, Green DJ, Yeap BB. Greater physical activity and higher androgen concentrations are independently associated with lower cardiometabolic risk in men. <i>Clin Endocrinol</i> , 2017; 87(5):466-474.                     | Busselton Health Survey                                                                          | Data access fees were too high for us                                                                            |
| 13 | Embersson JR, Whincup PH, Morris RW, Walker M. Social class differences in coronary heart disease in middle-aged British men: implications for prevention. <i>Int J Epidemiol</i> . 2004; 33(2): 289-296                                                                                        | British Regional Heart Study                                                                     | No suitable data were available                                                                                  |
| 14 | Crespo CJ, Garcia-Palmieri MR, Smit E, Lee IM, McGee D, Muti P, Figueroa Valle NR, Ramirez-Marrero FA, Freudenheim JL, Sorlie P. Physical activity and prostate cancer mortality in Puerto Rican men. <i>J Phys Act Health</i> 2008; 5(6):918-929                                               | The Puerto Rico Heart Health Program                                                             | No suitable data were available                                                                                  |
| 15 | Hu GC, Chien KL, Hsieh SF, Chen CY, Tsai WH, Su TC. Occupational Versus Leisure-Time Physical Activity in Reducing Cardiovascular Risks and Mortality Among Ethnic Chinese Adults in Taiwan. <i>Asia Pac J Public Health</i> , 2014; 26(6): 604-613.                                            | Chin-Shan Community Cardiovascular Cohort study                                                  | Responsible researcher(s) could not be reached                                                                   |
| 16 | Stamatakis E, Chau JY, Pedisic Z, Bauman A, Macniven R, Coombs N, Hamer M. Are sitting occupations associated with increased all-cause, cancer, and cardiovascular disease mortality risk? A pooled analysis of seven British population cohorts. <i>PLoS One</i> , 2013; 8(9):e73753.          | Health Survey for England (HSE) and the Scottish Health Survey (SHS)                             | Responsible researcher(s) could not be reached                                                                   |
| 17 | Hu G, Eriksson J, Barengo NC, Lakka TA, Valle TT, Nissinen A, Jousilahti P, Tuomilehto J. Occupational, commuting, and leisure-time physical activity in relation to total and cardiovascular mortality among Finnish subjects with type 2 diabetes. <i>Circulation</i> , 2004; 110(6):666-673. | Six cross-sectional surveys (within the North Karelia Project and the FINMONICA/Finrisk studies) | Responsible researcher(s) could not be reached                                                                   |
| 18 | Salonen JT, Slater JS, Tuomilehto J, Rauramaa R. Leisure time and occupational physical activity: risk of death from ischemic heart disease. <i>Am J Epidemiol</i> , 1988; 127(1):87-94.                                                                                                        | North Karelia Project                                                                            | Responsible researcher(s) could not be reached                                                                   |
| 19 | Johnson JV, Stewart W, Hall EM, Fredlund P, Theorell T. Long-term psychosocial work environment and cardiovascular mortality among Swedish men. <i>Am J Public Health</i> , 1996; 86(3): 324-331.                                                                                               | Random sample of the entire Swedish population obtained by Statistics Sweden                     | Responsible researcher(s) could not be reached                                                                   |
| 20 | Lapidus L, Bengtsson C. Socioeconomic factors and physical activity in relation to cardiovascular disease and death. A 12 year follow up of participants in a population study of women in Gothenburg, Sweden. <i>Br Heart J</i> , 1986; 55(3):295-301.                                         | Revenue Office Register                                                                          | Responsible researcher(s) could not be reached                                                                   |
| 21 | Li Y, Sato Y, Yamaguchi N. Lifestyle factors as predictors of general cardiovascular disease: use for early self-screening. <i>Asia Pac J Public Health</i> , 2014; 26(4):414-424.                                                                                                              | SAKUCESS (Saku Cancer Etiology Surveillance Study)                                               | Responsible researcher(s) could not be reached                                                                   |
| 22 | Śmigielski J, Ruszkowska J, Piotrowski W, Polakowska W, Bielecki W, Hanke W, Drygas W. The relationship between physical activity level and selected cardiovascular risk factors and                                                                                                            | National Multicentre Health Survey (WOBASZ)                                                      | Responsible researcher(s) could not be reached                                                                   |

|    |                                                                                                                                                                                                                                                                                                       |                                                                                        |                                                  |
|----|-------------------------------------------------------------------------------------------------------------------------------------------------------------------------------------------------------------------------------------------------------------------------------------------------------|----------------------------------------------------------------------------------------|--------------------------------------------------|
|    | mortality of males $\geq$ 50 years in Poland – The results of follow-up of participants of national multicentre health survey Wobasz. <i>Int J Occup Med Environ Health</i> , 2016;29(4): 633–648                                                                                                     |                                                                                        |                                                  |
| 23 | Hayashi R, Iso H, Cui R, Tamakoshi A, JACC Study Group. Occupational physical activity in relation to risk of cardiovascular mortality: The Japan Collaborative Cohort Study for Evaluation for Cancer Risk (JACC Study). <i>Prev Med</i> , 2016; 89:286-291.                                         | The Japan Collaborative Cohort Study for Evaluation for Cancer Risk (JACC Study)       | Responsible researcher(s) could not be reached   |
| 24 | Hrafnkelsdóttir SM, Torfadóttir JE, Aspelund T, Magnusson KT, Tryggvadóttir L, Gudnason V, Mucci LA, Stampfer M, Valdimarsdóttir UA. Physical Activity from Early Adulthood and Risk of Prostate Cancer: A 24-Year Follow-Up Study among Icelandic Men. <i>Cancer Prev Res</i> , 2015; 8(10):905-911. | Reykjavik Study                                                                        | Responsible researcher(s) could not be reached   |
| 25 | Rahman I, Bellavia A, Wolk A. Relationship between physical activity and heart failure risk in women. <i>Circ Heart Fail</i> , 2014; 7(6):877-881.                                                                                                                                                    | the Swedish Mammography Cohort                                                         | Responsible researcher(s) could not be reached   |
| 26 | Turi BC, Codogno JS, Fernandes RA, Sui X, Lavie CJ, Blair SN, Monteiro HL. Association of Different Physical Activity Domains on All-Cause Mortality in Adults Participating in Primary Care in the Brazilian National Health System: 4-Year Follow-up. <i>J Phys Act Health</i> , 2017; 14(1):45-51. | -                                                                                      | Responsible researcher(s) could not be reached   |
| 27 | Kim Y, Wilkens LR, Park SY, Goodman MT, Monroe KR, Kolonel LN. Association between various sedentary behaviours and all-cause, cardiovascular disease and cancer mortality: the Multiethnic Cohort Study. <i>Int J Epidemiol</i> , 2013; 42(4):1040-1056.                                             | Multiethnic Cohort Study                                                               | Responsible researcher(s) could not be reached   |
| 28 | Orsini N, Bellocco R, Bottai M, Pagano M, Michaelsson K, Wolk A. Combined effects of obesity and physical activity in predicting mortality among men. <i>J Intern Med</i> , 2008; 264(5):442-451                                                                                                      | The Cohort of Swedish Men (COSM)                                                       | Responsible researcher(s) could not be reached   |
| 29 | Yu S, Yarnell JW, Sweetnam PM, Murray L; Caerphilly study. What level of physical activity protects against premature cardiovascular death? The Caerphilly study. <i>Heart</i> , 2003; 89(5):502-506.                                                                                                 | Caerphilly collaborative heart disease study                                           | Responsible researcher(s) retired or passed away |
| 30 | Holme I, Helgeland A, Hjermann I, Leren P, Lund-Larsen PG. Physical activity at work and at leisure in relation to coronary risk factors and social class. A 4-year mortality follow-up. The Oslo study. <i>Acta Med Scand</i> , 1981; 209(4):277-283.                                                | Oslo study                                                                             | Responsible researcher(s) retired or passed away |
| 31 | Stender M, Hense HW, Doring A, Keil U. Physical Activity at Work and cardiovascular disease risk: results from the MONICA Augsburg Study. <i>Int J Epidemiol</i> , 1993; 22(4): 644-650                                                                                                               | MONICA Augsburg study                                                                  | Duplicate study                                  |
| 32 | Padyab M, Blomstedt Y, Norberg M. No association found between cardiovascular mortality, and job demands and decision latitude: experience from the Vasterbotten Intervention Programme in Sweden. <i>Soc Sci Med</i> , 2014; 117:58-66                                                               | Longitudinal integration database for health insurance and labor market studies (LISA) | Duplicate study                                  |
