# Supplementary material for: Associations of occupational and leisure-time physical activity with all-cause mortality: an individual participant data meta-analysis
Source: HighWire-hosted journal article supplement (doi:10.1136/bjsports-2024-108117), 2024-09-10
Supplement: bjsports-2024-108117supp007_data_supplement.pdf [file bjsports-2024-108117supp007_data_supplement.pdf]

Appendix 7. Risk of bias (RoB) of the studies included in the individual participant data meta-analysis.

| Reference                | Study name          | Study participation |                                                                                                                                   | Study attrition |                                                                             | Predicting variable measurement |                                                                                                                                                                                | Outcome  |                                                                                                                                       |
|--------------------------|---------------------|---------------------|-----------------------------------------------------------------------------------------------------------------------------------|-----------------|-----------------------------------------------------------------------------|---------------------------------|--------------------------------------------------------------------------------------------------------------------------------------------------------------------------------|----------|---------------------------------------------------------------------------------------------------------------------------------------|
|                          |                     | RoB                 | Explanation                                                                                                                       | RoB             | Explanation                                                                 | RoB                             | Explanation                                                                                                                                                                    | RoB      | Explanation                                                                                                                           |
| Clays, 2014 <sup>1</sup> | BELFIT study        | Moderate risk       | Unclear how participating companies were selected. Also, a substantial part of the selected participant (25%) did not participate | Moderate risk   | Of 2,363 eligible workers, 1456 were analysed. Loss to follow-up is unclear | Moderate risk                   | Accuracy of the occupational physical activity questionnaire is unclear. The Minnesota Leisure Time Physical Activity Questionnaire has shown reasonable accuracy <sup>2</sup> | Low risk | Ascertainment through registry seems adequate                                                                                         |
| Saidj, 2013 <sup>3</sup> | Health 2006 (H2006) | Moderate risk       | Participation rate was only 44% (although it was a random sample of the source population)                                        | Moderate        | Of 3,471 eligible workers, 2,544 were included. Unclear loss to follow-up   | Low risk                        | PAS2 questionnaire was used which has shown reasonable validity <sup>4</sup>                                                                                                   | Low risk | Ascertainment through registry seems adequate (based on personal communication with researchers – not reported in the referred paper) |
| Sjøel, 2003 <sup>5</sup> | MONICA Denmark      | Moderate risk       | Participation rate was below 80% (i.e., 79%)                                                                                      | Moderate        | Unclear loss to follow-up                                                   | Moderate risk                   | Although reproducibility has been assessed, validity of the physical                                                                                                           | Low risk | Ascertainment through registry seems adequate                                                                                         |

|                             |                    |               |                                                                                         |               |                                                                                                                                                                    |           |                                                                                                                                                                                                                          |          |                                               |
|-----------------------------|--------------------|---------------|-----------------------------------------------------------------------------------------|---------------|--------------------------------------------------------------------------------------------------------------------------------------------------------------------|-----------|--------------------------------------------------------------------------------------------------------------------------------------------------------------------------------------------------------------------------|----------|-----------------------------------------------|
|                             |                    |               |                                                                                         |               |                                                                                                                                                                    |           | activity questionnaire is unclear                                                                                                                                                                                        |          |                                               |
| Krause, 2017 <sup>6</sup>   | KIHD study         | Low risk      | There was an 83% participation rate and an adequate description of the sample (Table 1) | Low risk      | There was no loss of follow-up. All working participants were included and National Finnish death registries have complete data for all Finnish residents          | Low risk  | Occupational physical activity questionnaire showed good reliability (test-retest correlation 0.69 <sup>7</sup> ). The Minnesota Leisure Time Physical Activity Questionnaire has shown reasonable accuracy <sup>2</sup> | Low risk | Ascertainment through registry seems adequate |
| Pulsford, 2015 <sup>8</sup> | Whitehall II study | Moderate risk | Participation rate was below 80% (i.e., 73%).                                           | Moderate risk | Unclear how many participant were lost to follow-up and there appear to be differences between those who did and did not participate in the follow-up measurements | High risk | The Minnesota Leisure Time Physical Activity Questionnaire has shown reasonable accuracy (justifying a lower risk of bias score). However occupational physical activity assessment                                      | Low risk | Ascertainment through registry seems adequate |

|                                |                          |               |                                                                                                                            |          |                                                                                                                                              |               |                                                                                                                       |               |                                                                                               |
|--------------------------------|--------------------------|---------------|----------------------------------------------------------------------------------------------------------------------------|----------|----------------------------------------------------------------------------------------------------------------------------------------------|---------------|-----------------------------------------------------------------------------------------------------------------------|---------------|-----------------------------------------------------------------------------------------------|
|                                |                          |               |                                                                                                                            |          |                                                                                                                                              |               | based on job classification is prone to a high risk of bias (based on personal communication with the study)          |               |                                                                                               |
| Eaton, 1995 <sup>9</sup>       | IHDS study               | Low risk      | Authors report no significant differences between participant who did and did not participate                              | Low risk | Approximately 8463/10059=84% were followed up (although the percentage may be slightly different for those with physical activity reporting) | Moderate risk | Unclear accuracy of the used questionnaires (two single questions and source of these questions is unclear)           | Moderate risk | Multiple ways of ascertainment were used, showing high agreement                              |
| Autenrieth, 2011 <sup>10</sup> | MONICA/KOR A Augsburg    | Moderate risk | A random sample of the population was drawn and adequate description of the sample is provided (Table 1). 77% participated | Low risk | 20 out of 6637 participants were lost to follow-up                                                                                           | Moderate risk | MOSPA questionnaire was used which has shown reasonable accuracy <sup>11</sup>                                        | Low risk      | Ascertainment through registry and death certificate (for reason of mortality) seems adequate |
| Rosengren, 1997 <sup>12</sup>  | Primary Prevention Study | Moderate risk | Participation rate was below 80% (i.e., 75%)                                                                               | Low risk | All participants in the study were followed up                                                                                               | Moderate risk | Unclear accuracy of the used questionnaires. For leisure-time physical activity a reference is provided <sup>13</sup> | Low risk      | Ascertainment through registry seems adequate                                                 |

|                              |                  |               |                                                                                                                                     |          |                                                                      |               |                                                                                                                               |          |                                               |
|------------------------------|------------------|---------------|-------------------------------------------------------------------------------------------------------------------------------------|----------|----------------------------------------------------------------------|---------------|-------------------------------------------------------------------------------------------------------------------------------|----------|-----------------------------------------------|
| Richard, 2015 <sup>14*</sup> | NHANES study     | Low risk      | NHANES has shown to be generalizable to the US population                                                                           | Low risk | Only 26 participants did not have follow-up data                     | Moderate risk | Classification scheme according to profession and using Ainsworth tables to assess occupational physical activity             | Low risk | Mortality was ascertained from registries     |
| Moe, 2013 <sup>15</sup>      | HUNT study       | Moderate risk | Participation rate was below 80% (i.e., 70%)                                                                                        | Low risk | All participants were followed up                                    | Moderate risk | Accuracy of questions used is unclear (two questions were used to assess occupational physical activity, with unclear source) | Low risk | Ascertainment through registry seems adequate |
| Franzon, 2015 <sup>16</sup>  | ULSAM study      | Low risk      | All eligible participants were invited and 82% participated                                                                         | Low risk | 11 out of 2322 participants were lost to follow-up                   | Moderate risk | Accuracy of questionnaire used is unclear                                                                                     | Low risk | Ascertainment through registry seems adequate |
| Huerta, 2016 <sup>17</sup>   | EPIC Spain study | High risk     | Source population of the sample and its representativeness regarding that population is unclear. Participation rate is also unclear | Low risk | Approximately 3k participants out of 41k were lost to follow-up (7%) | Low risk      | EPIC-PAQ questionnaire was used which has shown reasonable accuracy <sup>18</sup> .                                           | Low risk | Ascertainment through registry seems adequate |
| Johnsen, 2016 <sup>19</sup>  | WOLF study       | Low risk      | There was an 82% response rate. Adequate description of the                                                                         | Low risk | 9,961/10,416=96% were followed.                                      | Moderate risk | Accuracy of questions is unclear                                                                                              | Low risk | Ascertainment through registry seems adequate |

|                            |                        |               |                                                                                                                                                                                                                                                                |               |                                                                                                         |               |                                                                                 |          |                                                        |
|----------------------------|------------------------|---------------|----------------------------------------------------------------------------------------------------------------------------------------------------------------------------------------------------------------------------------------------------------------|---------------|---------------------------------------------------------------------------------------------------------|---------------|---------------------------------------------------------------------------------|----------|--------------------------------------------------------|
|                            |                        |               | sample is provided (Table 1)                                                                                                                                                                                                                                   |               |                                                                                                         |               |                                                                                 |          |                                                        |
| Bahls, 2018 <sup>20</sup>  | SHIP-START1 study      | Moderate risk | A random sample of the population was drawn, with 68% response rate. Adequate description of the sample is provided (Table 1)                                                                                                                                  | Moderate risk | Unclear how many participants were lost to follow-up                                                    | Low risk      | Baecke questionnaire was used which has shown reasonable accuracy <sup>21</sup> | Low risk | Ascertainment through registry seems adequate          |
| Bahls, 2018 <sup>20</sup>  | CARLA study            | Moderate      | A random sample of the population was drawn with unclear response rate. Adequate description of the sample is provided (Table 2)                                                                                                                               | Moderate risk | Unclear how many participants were lost to follow-up                                                    | Low risk      | Baecke questionnaire was used which has shown reasonable accuracy <sup>21</sup> | Low risk | Ascertainment through registry seems adequate          |
| Wanner, 2014 <sup>22</sup> | The Swiss MONICA study | Low risk      | A two-stage sampling procedure was used drawing a sample of 51 out of 651 communities after stratification according to their size; and drawing a random sample from the resident population files of these communities (for more details see Bopp et al.: BMC | Low risk      | 99% of participants were followed up (while another 165 participants were excluded due to missing data) | Moderate risk | Accuracy (i.e., validity) of questions is unclear                               | Low risk | Ascertainment through national registry seems adequate |

|                                |                                          |               |                                                                                                                                                          |          |                                                                                                                                                    |               |                                                                                                     |          |                                                        |
|--------------------------------|------------------------------------------|---------------|----------------------------------------------------------------------------------------------------------------------------------------------------------|----------|----------------------------------------------------------------------------------------------------------------------------------------------------|---------------|-----------------------------------------------------------------------------------------------------|----------|--------------------------------------------------------|
|                                |                                          |               | Public Health 2010 10:562)                                                                                                                               |          |                                                                                                                                                    |               |                                                                                                     |          |                                                        |
| Wanner, 2014 <sup>22</sup>     | NRP 1A study                             | Moderate risk | Sampling procedure is unclear (with a combination of a random and convenience sample used).                                                              | Low risk | 93% of participants were followed up (while another 500 participants were excluded due to missing data)                                            | Moderate risk | Accuracy (i.e., validity) of questions is unclear                                                   | Low risk | Ascertainment through national registry seems adequate |
| Petersen, 2012 <sup>23</sup>   | Danish National Health Interview Surveys | Low risk      | National representative sample, in which at least 80% of the eligible participants took part. Good description of the sample                             | Low risk | 143 participants (~1%) were lost due to unknown vital status, and 1946 because they did not provide physical activity data (~16 drop out in total) | Moderate risk | Questionnaire is well describe. But its origin and accuracy are unclear                             | Low risk | Ascertainment through registry seems adequate          |
| Dalene, 2021 <sup>24</sup>     | Norwegian study                          | Moderate risk | National representative sample and good description of the sample. However, 71% of the eligible participants took part in the study                      | Low risk | Due to registry data used, the vast majority of participants appeared to be followed up (2% drop out).                                             | Low risk      | Saltin-Grimby Physical Activity Level with known accuracy was used.                                 | Low risk | Ascertainment through registry seems adequate          |
| Holtermann, 2012 <sup>25</sup> | Copenhagen City Heart Study              | Moderate risk | Representative sample for the Copenhagen area, with good description of the sample. However, only 70-74% of eligible participants took part in the study | Low risk | Due to registry data used, the vast majority of participants appeared to be followed up.                                                           | Moderate risk | The questionnaire was earlier used and well described. However, its origin and accuracy is unclear. | Low risk | Ascertainment through registry seems adequate          |

|                                                                                                                                                                                                                                                                                                                                                                                                                                                                                                            |                                     |               |                                                                                                                                                       |          |                                                                                          |               |                                                                                  |          |                                               |
|------------------------------------------------------------------------------------------------------------------------------------------------------------------------------------------------------------------------------------------------------------------------------------------------------------------------------------------------------------------------------------------------------------------------------------------------------------------------------------------------------------|-------------------------------------|---------------|-------------------------------------------------------------------------------------------------------------------------------------------------------|----------|------------------------------------------------------------------------------------------|---------------|----------------------------------------------------------------------------------|----------|-----------------------------------------------|
| Holtermann , 2021 <sup>26</sup>                                                                                                                                                                                                                                                                                                                                                                                                                                                                            | Copenhagen General Population Study | Moderate risk | Representative sample for the Copenhagen area, with good description of the sample. However, only 43% of eligible participants took part in the study | Low risk | Due to registry data used, the vast majority of participants appeared to be followed up. | Moderate risk | The questionnaire was earlier used. However, its origin and accuracy is unclear. | Low risk | Ascertainment through registry seems adequate |
| Holtermann , 2009 <sup>27</sup>                                                                                                                                                                                                                                                                                                                                                                                                                                                                            | Copenhagen male study               | Moderate risk | High response rate (87%) and good description of the sample. Sample of workers from various companies.                                                | Low risk | Only nine men had missing answers, and 14 had emigrated during the follow-up             | Moderate risk | The questionnaire was earlier used. However, its origin and accuracy is unclear. | Low risk | Ascertainment through registry seems adequate |
| * Although a reference is made to the paper by Richard and colleagues (which is the only paper we identified on the topic using NHANES data and based on which the current risk of bias assessment has been conducted), different measurement waves were included for our meta-analysis. Measurements of the following waves were used in which all dependent and confounding variables were assessed: 2005-2006, 2007-2008, 2009-2010, 2011-2012. For outcomes the 2015 follow-up measurements were used. |                                     |               |                                                                                                                                                       |          |                                                                                          |               |                                                                                  |          |                                               |

**References**

1. Clays E, Lidegaard M, De Bacquer D, et al. The combined relationship of occupational and leisure-time physical activity with all-cause mortality among men, accounting for physical fitness. *American journal of epidemiology* 2014;179(5):559-66. doi: 10.1093/aje/kwt294
2. Taylor HL, Jacobs Jr DR, Schucker B, et al. A questionnaire for the assessment of leisure time physical activities. *Journal of Chronic Diseases* 1978;31(12):741-55. doi: 10.1016/0021-9681(78)90058-9
3. Saidj M, Jorgensen T, Jacobsen RK, et al. Separate and joint associations of occupational and leisure-time sitting with cardio-metabolic risk factors in working adults: a cross-sectional study. *PLoS one* 2013;8(8):e70213. doi: 10.1371/journal.pone.0070213
4. Andersen LG, Groenvold M, Jørgensen T, Aadahl M. Construct validity of a revised Physical Activity Scale and testing by cognitive interviewing. *Scandinavian journal of public health* 2010;38(7):707-14. doi: 10.1177/1403494810380099
5. Sjøel A, Thomsen KK, Schroll M, Andersen LB. Secular trends in acute myocardial infarction in relation to physical activity in the general Danish population. *Scandinavian journal of medicine & science in sports* 2003;13(4):224-30.
6. Krause N, Arah OA, Kauhanen J. Physical activity and 22-year all-cause and coronary heart disease mortality. *American Journal of Industrial Medicine* 2017;60(11):976-90. doi: 10.1002/ajim.22756
7. Lakka TA, Salonen JT. Intra-person variability of various physical activity assessments in the kuopio ischaemic heart disease risk factor study. *International journal of epidemiology* 1992;21(3):467-72. doi: 10.1093/ije/21.3.467
8. Pulsford RM, Stamatakis E, Britton AR, et al. Associations of sitting behaviours with all-cause mortality over a 16-year follow-up: the Whitehall II study. *International journal of epidemiology* 2015;44(6):1909-16.
9. Eaton CB, Medalie JH, Flocke SA, et al. Self-reported physical activity predicts long-term coronary heart disease and all-cause mortalities. Twenty-one-year follow-up of the Israeli Ischemic Heart Disease Study. *Archives of family medicine* 1995;4(4):323-29.
10. Autenrieth CS, Baumert J, Baumeister SE, et al. Association between domains of physical activity and all-cause, cardiovascular and cancer mortality. *European journal of epidemiology* 2011;26(2):91-99. doi: 10.1007/s10654-010-9517-6
11. Iqbal R, Rafique G, Badruddin S, et al. Validating MOSPA questionnaire for measuring physical activity in Pakistani women. *Nutr J* 2006;5:18. doi: 10.1186/1475-2891-5-18
12. Rosengren A, Wilhelmsen L. Physical activity protects against coronary death and deaths from all causes in middle-aged men. Evidence from a 20-year follow-up of the primary prevention study in Goteborg. *Annals of Epidemiology* 1997;7(1):69-75.
13. Wilhelmsen L, Tibblin G, Aurell M, et al. Physical activity, physical fitness and risk of myocardial infarction. *Advances in Cardiology* 1976;18(0):217-30. doi: 10.1159/000399526
14. Richard A, Martin B, Wanner M, et al. Effects of leisure-time and occupational physical activity on total mortality risk in NHANES III according to sex, ethnicity, central obesity, and age. *Journal of physical activity & health* 2015;12(2):184-92. doi: 10.1123/jpah.2013-0198
15. Moe B, Mork PJ, Holtermann A, Nilsen TI. Occupational physical activity, metabolic syndrome and risk of death from all causes and cardiovascular disease in the HUNT 2 cohort study. *Occupational and Environmental Medicine* 2013;70(2):86-90. doi: 10.1136/oemed-2012-100734



16. Franzon K, Zethelius B, Cederholm T, Kilander L. Modifiable midlife risk factors, independent aging, and survival in older men: report on long-term follow-up of the Uppsala Longitudinal Study of Adult Men cohort. *Journal of the American Geriatrics Society* 2015;63(5):877-85. doi: 10.1111/jgs.13352
17. Huerta JM, Chirlaque MD, Tormo MJ, et al. Work, household, and leisure-time physical activity and risk of mortality in the EPIC-Spain cohort. *Preventive medicine* 2016;85:106-12. doi: 10.1016/j.ypmed.2016.02.009
18. Peters T, Brage S, Westgate K, et al. Validity of a short questionnaire to assess physical activity in 10 European countries. *European journal of epidemiology* 2012;27(1):15-25. doi: 10.1007/s10654-011-9625-y
19. Johnsen AM, Alfredsson L, Knutsson A, et al. Association between occupational physical activity and myocardial infarction: a prospective cohort study. *BMJ Open* 2016;6(10):e012692. doi: 10.1136/bmjopen-2016-012692
20. Bahls M, Groß S, Baumeister SE, et al. Association of domain-specific physical activity and cardiorespiratory fitness with all-cause and cause-specific mortality in two population-based cohort studies. *Sci Rep* 2018;8(1):16066. doi: 10.1038/s41598-018-34468-7
21. Philippaerts RM, Westerterp KR, Lefevre J. Doubly labelled water validation of three physical activity questionnaires. *International Journal of Sports Medicine* 1999;20:284–89. doi: <https://doi.org/10.1055/s-2007-971132>
22. Wanner M, Tarnutzer S, Martin BW, et al. Impact of different domains of physical activity on cause-specific mortality: a longitudinal study. *Preventive medicine* 2014;62:89-95. doi: 10.1016/j.ypmed.2014.01.025
23. Petersen CB, Eriksen L, Tolstrup JS, et al. Occupational heavy lifting and risk of ischemic heart disease and all-cause mortality. *BMC Public Health* 2012;12:1070. doi: 10.1186/1471-2458-12-1070
24. Dalene KE, Tarp J, Selmer RM, et al. Occupational physical activity and longevity: A prospective cohort study of 437 378 Norwegian working men and women. *Lancet Public Health* 2021;6(6):e386-e95. doi: 10.1016/S2468-2667(21)00032-3
25. Holtermann A, Marott JL, Gyntelberg F, et al. Occupational and leisure time physical activity: risk of all-cause mortality and myocardial infarction in the Copenhagen City Heart Study. A prospective cohort study. *BMJ Open* 2012;2(1):e000556. doi: 10.1136/bmjopen-2011-000556
26. Holtermann A, Schnohr P, Nordestgaard BG, Marott JL. The physical activity paradox in cardiovascular disease and all-cause mortality: the contemporary Copenhagen General Population Study with 104,046 adults. *European Heart Journal* 2021:ehab087. doi: 10.1093/eurheartj/ehab087
27. Holtermann A, Mortensen OS, Burr H, et al. The interplay between physical activity at work and during leisure time--risk of ischemic heart disease and all-cause mortality in middle-aged Caucasian men. *Scandinavian Journal of Work, Environment & Health* 2009;35(6):466-74.
