# Supplementary material for: Associations of occupational and leisure-time physical activity with all-cause mortality: an individual participant data meta-analysis
Source: HighWire-hosted journal article supplement (doi:10.1136/bjsports-2024-108117), 2024-09-10
Supplement: bjsports-2024-108117supp011_data_supplement.pdf [file bjsports-2024-108117supp011_data_supplement.pdf]

Appendix 11. Sensitivity analysis showing the association of occupational physical activity (OPA) and leisure-time physical activity (LTPA) with all-cause mortality, stratified by education level.

The association of occupational physical activity (OPA) with all-cause mortality among males. Models with either the sedentary (left columns) and low OPA category (right column) as reference are shown.

|                          |               | n      | N  | HR [95% CI]      | n      | N  | HR [95% CI]      |
|--------------------------|---------------|--------|----|------------------|--------|----|------------------|
| Low education level      | Sedentary OPA | 28,868 | 15 | 1.00 (reference) | 28,774 | 14 | 1.01 [0.97-1.05] |
|                          | Low OPA       | 24,255 | 14 | 0.99 [0.95-1.03] | 24,255 | 15 | 1.00 (reference) |
|                          | Moderate OPA  | 24,735 | 15 | 0.99 [0.94-1.04] | 24,446 | 15 | 0.99 [0.95-1.02] |
|                          | High OPA      | 15,952 | 14 | 1.02 [0.93-1.13] | 15,800 | 14 | 1.00 [0.96-1.04] |
| Moderate education level | Sedentary OPA | 63,824 | 16 | 1.00 (reference) | 63,455 | 15 | 0.99 [0.96-1.03] |
|                          | Low OPA       | 47,536 | 15 | 1.01 [0.97-1.04] | 48,802 | 17 | 1.00 (reference) |
|                          | Moderate OPA  | 41,502 | 16 | 1.11 [1.02-1.20] | 41,687 | 17 | 1.04 [1.01-1.08] |
|                          | High OPA      | 22,947 | 14 | 1.19 [1.02-1.37] | 23,293 | 16 | 1.08 [0.95-1.22] |
| High education level     | Sedentary OPA | 54,543 | 8  | 1.00 (reference) | 55,033 | 7  | 0.95 [0.90-1.00] |
|                          | Low OPA       | 26,333 | 7  | 1.06 [1.00-1.12] | 27,164 | 9  | 1.00 (reference) |
|                          | Moderate OPA  | 10,560 | 8  | 1.10 [0.92-1.31] | 10,289 | 8  | 1.07 [0.90-1.28] |
|                          | High OPA      | 4,793  | 7  | 1.12 [0.96-1.32] | 5,399  | 8  | 1.08 [0.91-1.27] |

n = number of participants; N = number of studies; HR = hazard ratio; 95% CI = 95% confidence interval; OPA = occupational physical activity  
Note that the number of studies (N) differs across comparisons, as not all occupational physical activity categories were available from all studies (see Appendix 2 for an overview).

Estimates are from model 2: Adjusted for leisure-time physical activity, age, body mass index and smoking.

Occupational physical activity levels reflect the physical activity continuum, i.e., sedentary, low, moderate, and high. Categories roughly indicate: mainly sitting work (sedentary), work that mainly involves standing or walking, but without lifting or carrying loads (low), work that involves carrying light objects or walking stairs (moderate), physically demanding work involving frequent carrying or lifting heavy loads (high).

Education levels reflect low (pre-primary/primary/lower secondary), moderate (upper secondary), and high (post-secondary) education, using the International Standard Classification of Education (ISCED-97).

The association of occupational physical activity (OPA) with all-cause mortality among females. Models with either the sedentary (left columns) and low OPA category (right column) as reference are shown.

|                          |               | n      | N  | HR [95% CI]      | n      | N  | HR [95% CI]      |
|--------------------------|---------------|--------|----|------------------|--------|----|------------------|
| Low education level      | Sedentary OPA | 25,563 | 10 | 1.00 (reference) | 25,117 | 9  | 1.08 [1.00-1.16] |
|                          | Low OPA       | 48,980 | 9  | 0.93 [0.87-1.00] | 48,964 | 10 | 1.00 (reference) |
|                          | Moderate OPA  | 22,547 | 10 | 0.87 [0.79-0.97] | 22,264 | 9  | 0.94 [0.90-0.98] |
|                          | High OPA      | 7,011  | 9  | 0.93 [0.77-1.14] | 6,928  | 9  | 1.08 [0.88-1.32] |
| Moderate education level | Sedentary OPA | 61,277 | 13 | 1.00 (reference) | 60,188 | 12 | 1.00 [0.89-1.12] |
|                          | Low OPA       | 75,131 | 12 | 1.00 [0.89-1.12] | 74,887 | 13 | 1.00 (reference) |
|                          | Moderate OPA  | 38,337 | 12 | 0.92 [0.79-1.07] | 37,941 | 11 | 0.95 [0.91-0.99] |
|                          | High OPA      | 4,928  | 8  | 1.15 [0.85-1.56] | 4,617  | 8  | 1.02 [0.85-1.23] |
| High education level     | Sedentary OPA | 39,214 | 10 | 1.00 (reference) | 38,363 | 8  | 1.06 [0.98-1.14] |
|                          | Low OPA       | 47,942 | 8  | 0.95 [0.88-1.02] | 47,798 | 9  | 1.00 (reference) |
|                          | Moderate OPA  | 20,344 | 8  | 1.04 [0.94-1.15] | 20,111 | 7  | 1.11 [1.01-1.22] |
|                          | High OPA      | 1,099  | 6  | 1.18 [0.85-1.64] | 1,070  | 6  | 1.16 [0.87-1.54] |

n = number of participants; N = number of studies; HR = hazard ratio; 95% CI = 95% confidence interval; OPA = occupational physical activity  
Note that the number of studies (N) differs across comparisons, as not all occupational physical activity categories were available from all studies (see Appendix 2 for an overview).

Estimates are from model 2: Adjusted for leisure-time physical activity, age, body mass index and smoking.

Occupational physical activity levels reflect the physical activity continuum, i.e., sedentary, low, moderate, and high. Categories roughly indicate: mainly sitting work (sedentary), work that mainly involves standing or walking, but without lifting or carrying loads (low), work that involves carrying light objects or walking stairs (moderate), physically demanding work involving frequent carrying or lifting heavy loads (high).

The association of leisure-time physical activity (LTPA) with all-cause mortality among males. Models with either the sedentary (left columns) and low LTPA category (right column) as reference are shown.

|                          |                | n      | N  | HR [95% CI]      | n      | N  | HR [95% CI]      |
|--------------------------|----------------|--------|----|------------------|--------|----|------------------|
| Low education level      | Sedentary LTPA | 18,231 | 16 | 1.00 (reference) | 18,231 | 16 | 1.11 [1.03-1.2]  |
|                          | Low LTPA       | 37,868 | 16 | 0.90 [0.84-0.97] | 38,948 | 19 | 1.00 (reference) |
|                          | Moderate LTPA  | 28,476 | 16 | 0.84 [0.77-0.92] | 31,266 | 19 | 0.89 [0.84-0.95] |
|                          | High LTPA      | 7,823  | 13 | 0.83 [0.72-0.94] | 8,179  | 16 | 0.88 [0.78-0.99] |
|                          |                | n      | N  | HR [95% CI]      | n      | N  | HR [95% CI]      |
| Moderate education level | Sedentary LTPA | 34,650 | 18 | 1.00 (reference) | 34,206 | 18 | 1.16 [1.09-1.24] |
|                          | Low LTPA       | 72,791 | 18 | 0.86 [0.81-0.92] | 73,824 | 21 | 1.00 (reference) |
|                          | Moderate LTPA  | 51,799 | 18 | 0.78 [0.71-0.87] | 54,551 | 21 | 0.90 [0.84-0.96] |
|                          | High LTPA      | 14,890 | 15 | 0.76 [0.65-0.89] | 15,126 | 18 | 0.84 [0.77-0.92] |
|                          |                | n      | N  | HR [95% CI]      | n      | N  | HR [95% CI]      |
| High education level     | Sedentary LTPA | 14,604 | 15 | 1.00 (reference) | 14,604 | 14 | 1.21 [1.09-1.34] |
|                          | Low LTPA       | 39,747 | 14 | 0.83 [0.75-0.91] | 40,655 | 19 | 1.00 (reference) |
|                          | Moderate LTPA  | 34,296 | 14 | 0.76 [0.66-0.87] | 36,506 | 19 | 0.94 [0.88-1.01] |
|                          | High LTPA      | 10,229 | 12 | 0.80 [0.72-0.90] | 11,375 | 17 | 0.94 [0.86-1.04] |

n = number of participants; N = number of studies; HR = hazard ratio; 95% CI = 95% confidence interval; LTPA = leisure-time physical activity  
Note that the number of studies (N) differs across comparisons, as not all leisure-time physical activity categories were available from all studies (see Appendix 2 for an overview).

Estimates are from model 2: Adjusted for occupational physical activity, age, body mass index and smoking.

Leisure-time physical activity levels reflect the physical activity continuum, i.e., sedentary, low, moderate, and high. Categories roughly indicate: almost no regular physical activity, spending most leisure time sitting (sedentary), occasionally engaging in leisure time activities such as slow walking or household activities (low), engaging in activities such as intense household activities or brisk walking (moderate), regular engagement in activities such as jogging or cycling (high).

The association of leisure-time physical activity (LTPA) with all-cause mortality among females. Models with either the sedentary (left columns) and low LTPA category (right column) as reference are shown.

|                          |                | n      | N  | HR [95% CI]      | n       | N  | HR [95% CI]      |
|--------------------------|----------------|--------|----|------------------|---------|----|------------------|
| Low education level      | Sedentary LTPA | 17,488 | 10 | 1.00 (reference) | 17,488  | 10 | 1.13 [1.09-1.18] |
|                          | Low LTPA       | 53,584 | 10 | 0.88 [0.85-0.92] | 54,678  | 13 | 1.00 (reference) |
|                          | Moderate LTPA  | 25,570 | 10 | 0.80 [0.75-0.86] | 26,806  | 13 | 0.92 [0.87-0.98] |
|                          | High LTPA      | 4,790  | 8  | 0.82 [0.63-1.07] | 5,027   | 10 | 0.90 [0.70-1.16] |
|                          |                | n      | N  | HR [95% CI]      | n       | N  | HR [95% CI]      |
| Moderate education level | Sedentary LTPA | 33,051 | 13 | 1.00 (reference) | 33,051  | 13 | 1.21 [1.16-1.25] |
|                          | Low LTPA       | 99,501 | 13 | 0.83 [0.80-0.86] | 100,279 | 15 | 1.00 (reference) |
|                          | Moderate LTPA  | 37,649 | 13 | 0.68 [0.58-0.79] | 39,065  | 15 | 0.89 [0.83-0.94] |
|                          | High LTPA      | 6,907  | 9  | 0.69 [0.57-0.83] | 7,143   | 11 | 0.77 [0.74-0.80] |
|                          |                | n      | N  | HR [95% CI]      | n       | N  | HR [95% CI]      |
| High education level     | Sedentary LTPA | 14,084 | 9  | 1.00 (reference) | 14,084  | 9  | 1.12 [1.03-1.22] |
|                          | Low LTPA       | 55,511 | 9  | 0.89 [0.82-0.97] | 55,955  | 12 | 1.00 (reference) |
|                          | Moderate LTPA  | 31,026 | 8  | 0.81 [0.72-0.91] | 32,059  | 11 | 0.95 [0.83-1.08] |
|                          | High LTPA      | 6,087  | 7  | 0.77 [0.61-0.96] | 6,746   | 9  | 0.85 [0.70-1.03] |

n = number of participants; N = number of studies; HR = hazard ratio; 95% CI = 95% confidence interval; LTPA = leisure-time physical activity  
Note that the number of studies (N) differs across comparisons, as not all leisure-time physical activity categories were available from all studies (see Appendix 2 for an overview).

Estimates are from model 2: Adjusted for occupational physical activity, age, body mass index and smoking.

Leisure-time physical activity levels reflect the physical activity continuum, i.e., sedentary, low, moderate, and high. Categories roughly indicate: almost no regular physical activity, spending most leisure time sitting (sedentary), occasionally engaging in leisure time activities such as slow walking or household activities (low), engaging in activities such as intense household activities or brisk walking (moderate), regular engagement in activities such as jogging or cycling (high).
