# Supplementary material for: Associations of occupational and leisure-time physical activity with all-cause mortality: an individual participant data meta-analysis
Source: HighWire-hosted journal article supplement (doi:10.1136/bjsports-2024-108117), 2024-09-10

Appendix 12. Funnel plot showing the standard error of individual studies plotted against the beta, in order to indicate publication bias.

Funnel plot for the association of low versus sedentary occupational physical activity with all-cause mortality among males from model 3 (adjusted for leisure-time physical activity, age, BMI, smoking and education level).

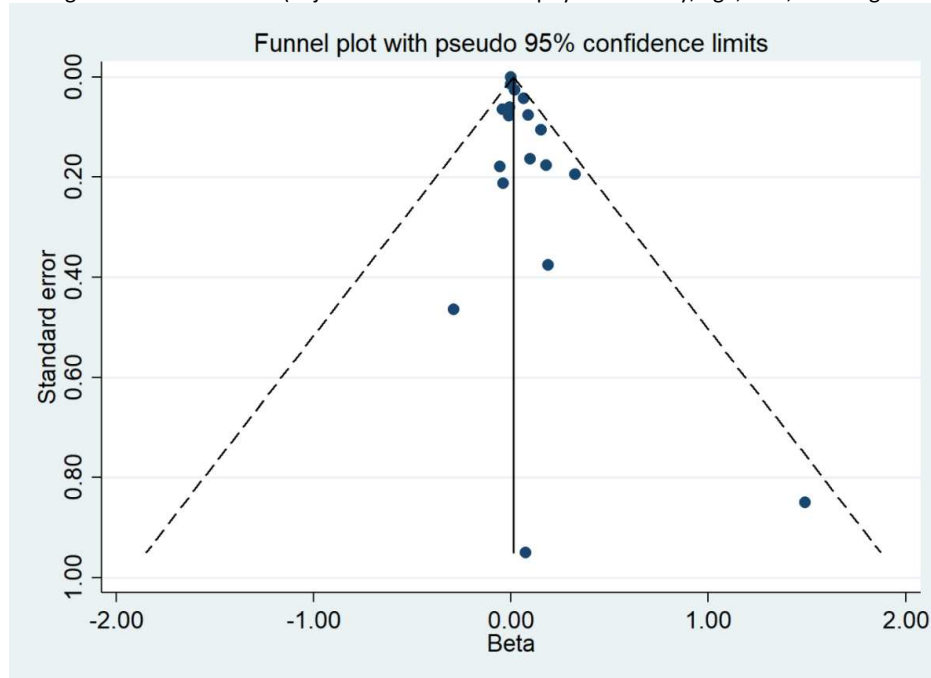

Funnel plot for the association of moderate versus sedentary occupational physical activity with all-cause mortality among males from model 3 (adjusted for leisure-time physical activity, age, BMI, smoking and education level).

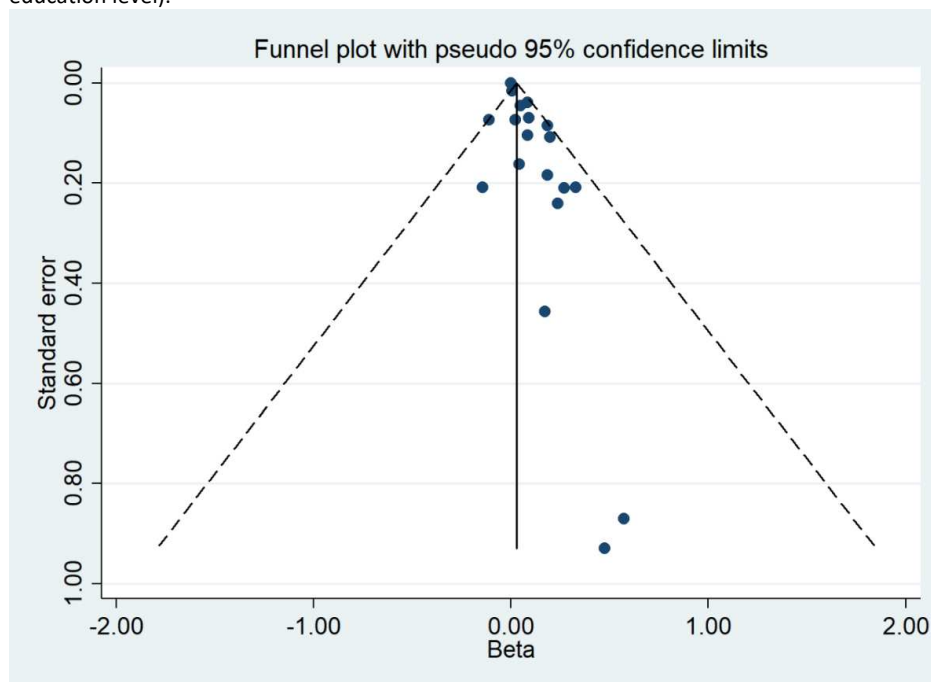

Funnel plot for the association of high versus sedentary occupational physical activity with all-cause mortality among males from model 3 (adjusted for leisure-time physical activity, age, BMI, smoking and education level).

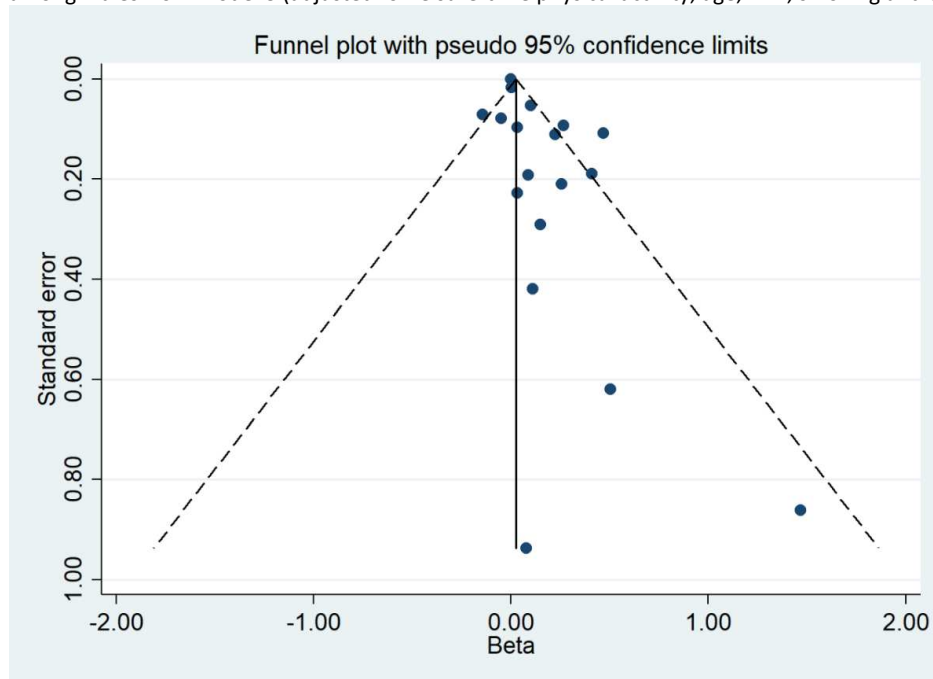

Funnel plot for the association of low versus sedentary leisure-time physical activity with all-cause mortality among females from model 3 (adjusted for occupational physical activity, age, BMI, smoking and education level).

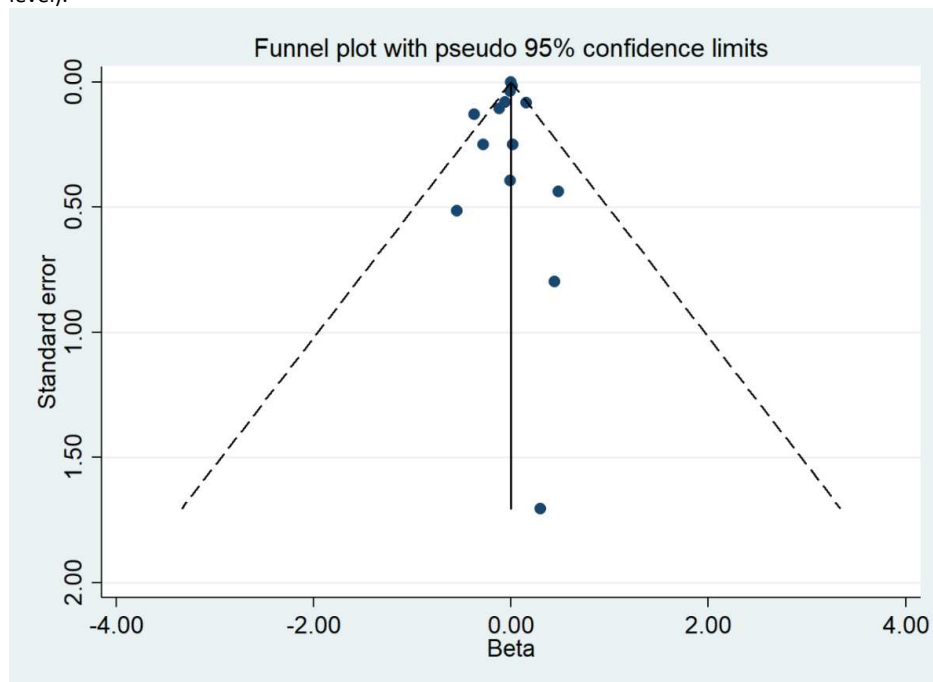

Funnel plot for the association of moderate versus sedentary leisure-time physical activity with all-cause mortality among females from model 3 (adjusted for occupational physical activity, age, BMI, smoking and education level).

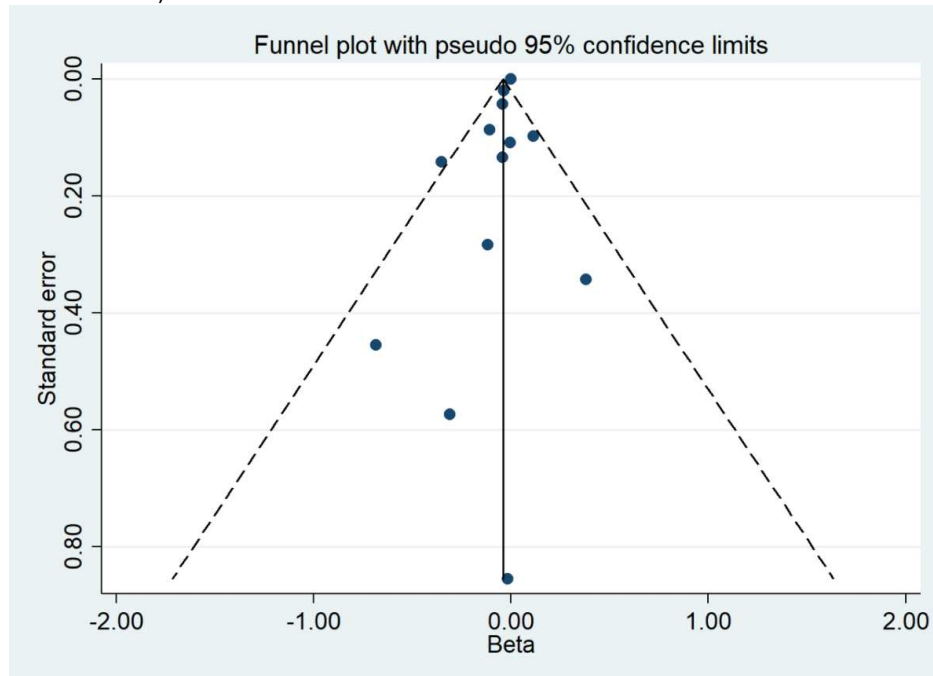

Funnel plot for the association of high versus sedentary leisure-time physical activity with all-cause mortality among females from model 3 (adjusted for occupational physical activity, age, BMI, smoking and education level).

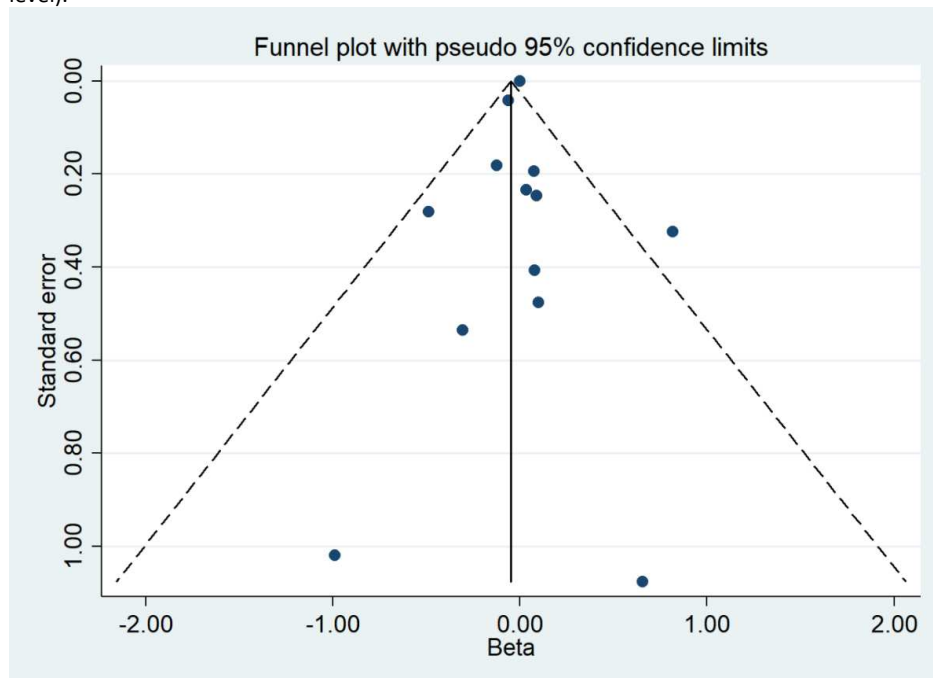

Supplement: bjsports-2024-108117supp012_data_supplement.pdf [file bjsports-2024-108117supp012_data_supplement.pdf]
