# Supplementary material for: Associations of occupational and leisure-time physical activity with all-cause mortality: an individual participant data meta-analysis
Source: HighWire-hosted journal article supplement (doi:10.1136/bjsports-2024-108117), 2024-09-10
Supplement: bjsports-2024-108117supp013_data_supplement.pdf [file bjsports-2024-108117supp013_data_supplement.pdf]

Appendix 13. Sensitivity analyses showing the association of occupational and leisure-time physical activity with all-cause mortality for studies with low compared to moderate/high risk of bias regarding study participation, attrition and predictive variable (i.e., physical activity) assessment. Models are shown for males and females from model 3; i.e., adjusted for leisure-time physical activity, age, BMI, smoking and education level.

|                                                                                 |                    |               | Males   |    |                  | Females |    |                  |
|---------------------------------------------------------------------------------|--------------------|---------------|---------|----|------------------|---------|----|------------------|
|                                                                                 |                    |               | n       | N  | HR [95% CI]      | n       | N  | HR [95% CI]      |
| Risk of bias regarding study participation                                      | Low risk           | Sedentary OPA | 13,130  | 8  | 1.00 (reference) | 6,537   | 5  | 1.00 (reference) |
|                                                                                 |                    | Low OPA       | 11,070  | 8  | 1.00 [0.98 1.03] | 5,862   | 5  | 1.01 [0.98 1.04] |
|                                                                                 |                    | Moderate OPA  | 7,371   | 8  | 1.03 [0.98 1.09] | 3,257   | 4  | 0.96 [0.93 1.00] |
|                                                                                 |                    | High OPA      | 3,526   | 7  | 1.10 [0.99 1.22] | 720     | 4  | 0.99 [0.82 1.19] |
|                                                                                 | Moderate/high risk | Sedentary OPA | 103,186 | 10 | 1.00 (reference) | 85,678  | 9  | 1.00 (reference) |
|                                                                                 |                    | Low OPA       | 68,887  | 9  | 1.03 [0.99 1.08] | 129,292 | 8  | 0.81 [0.70 0.95] |
|                                                                                 |                    | Moderate OPA  | 55,193  | 10 | 1.09 [1.03 1.16] | 57,225  | 8  | 0.83 [0.70 0.99] |
|                                                                                 |                    | High OPA      | 33,771  | 10 | 1.17 [0.95 1.43] | 5,792   | 8  | 1.02 [0.71 1.46] |
|                                                                                 |                    |               | n       | N  | HR [95% CI]      | n       | N  | HR [95% CI]      |
| Risk of bias regarding attrition                                                | Low risk           | Sedentary OPA | 113,431 | 13 | 1.00 (reference) | 90,597  | 10 | 1.00 (reference) |
|                                                                                 |                    | Low OPA       | 77,772  | 12 | 1.07 [0.83 1.38] | 133,060 | 9  | 0.95 [0.63 1.43] |
|                                                                                 |                    | Moderate OPA  | 61,126  | 13 | 1.26 [0.98 1.63] | 59,949  | 10 | 0.58 [0.27 1.28] |
|                                                                                 |                    | High OPA      | 36,127  | 12 | 1.33 [1.03 1.71] | 5,703   | 10 | 1.12 [0.70 1.80] |
|                                                                                 | Moderate/high risk | Sedentary OPA | 2,885   | 5  | 1.00 (reference) | 1,618   | 4  | 1.00 (reference) |
|                                                                                 |                    | Low OPA       | 2,185   | 5  | 1.01 [0.99 1.03] | 2,094   | 4  | 0.98 [0.91 1.05] |
|                                                                                 |                    | Moderate OPA  | 1,438   | 5  | 1.05 [1.00 1.10] | 533     | 2  | 0.96 [0.92 1.00] |
|                                                                                 |                    | High OPA      | 1,170   | 5  | 1.10 [1.00 1.21] | 809     | 2  | 0.97 [0.83 1.14] |
|                                                                                 |                    |               | n       | N  | HR [95% CI]      | n       | N  | HR [95% CI]      |
| Risk of bias regarding predictive variable (i.e., physical activity) assessment | Low risk           | Sedentary OPA | 77,269  | 5  | 1.00 (reference) | 62,321  | 4  | 1.00 (reference) |
|                                                                                 |                    | Low OPA       | 53,865  | 5  | 1.03 [0.99 1.06] | 103,990 | 4  | 0.94 [0.84 1.05] |
|                                                                                 |                    | Moderate OPA  | 42,785  | 5  | 1.07 [1.02 1.12] | 39,844  | 2  | 0.95 [0.87 1.03] |
|                                                                                 |                    | High OPA      | 26,039  | 5  | 1.09 [0.99 1.21] | 4,069   | 2  | 1.01 [0.82 1.24] |
|                                                                                 | Moderate/high risk | Sedentary OPA | 39,047  | 13 | 1.00 (reference) | 29,894  | 10 | 1.00 (reference) |
|                                                                                 |                    | Low OPA       | 26,092  | 12 | 1.05 [0.91 1.21] | 31,164  | 9  | 1.01 [0.98 1.04] |
|                                                                                 |                    | Moderate OPA  | 19,779  | 13 | 1.01 [0.98 1.04] | 20,638  | 10 | 0.96 [0.92 1.00] |
|                                                                                 |                    | High OPA      | 11,258  | 12 | 1.36 [0.90 2.04] | 2,443   | 10 | 0.94 [0.87 1.02] |

N = number of studies; HR = hazard ratio; 95% CI = 95% confidence interval; OPA = Occupational physical activity  
Occupational physical activity levels reflect the physical activity continuum, i.e., sedentary, low, moderate, and high. Categories roughly indicate: mainly sitting work (sedentary), work that mainly involves standing or walking, but without lifting or carrying loads (low), work that involves carrying light objects or walking stairs (moderate), physically demanding work involving frequent carrying or lifting heavy loads (high).
