# Supplementary material for: Associations of occupational and leisure-time physical activity with all-cause mortality: an individual participant data meta-analysis
Source: HighWire-hosted journal article supplement (doi:10.1136/bjsports-2024-108117), 2024-09-10
Supplement: bjsports-2024-108117supp014_data_supplement.pdf [file bjsports-2024-108117supp014_data_supplement.pdf]

Appendix 14. Leave one study out analyses, showing the minimum and maximum hazard ratios found when leaving either of the 22 individual studies out of the model. Models are shown for both the association of occupational physical activity (OPA) and leisure-time physical activity (LTPA) and all-cause mortality for males and females and are from model 3; i.e., adjusted for leisure-time physical activity, age, BMI, smoking and education level.

|                                |                      |                | Males            | Females          |
|--------------------------------|----------------------|----------------|------------------|------------------|
|                                |                      |                | HR [95% CI]      | HR [95% CI]      |
| Occupational physical activity | Minimum effect sizes | Sedentary OPA  | 1.00 (reference) | 1.00 (reference) |
|                                |                      | Low OPA        | 1.01 [0.99 1.03] | 0.95 [0.86 1.05] |
|                                |                      | Moderate OPA   | 1.04 [1.00 1.08] | 0.95 [0.87 1.03] |
|                                |                      | High OPA       | 1.07 [1.00 1.16] | 0.94 [0.87 1.02] |
|                                | Maximum effect sizes | Sedentary OPA  | 1.00 (reference) | 1.00 (reference) |
|                                |                      | Low OPA        | 1.03 [0.99 1.07] | 1.01 [0.98 1.03] |
|                                |                      | Moderate OPA   | 1.07 [1.07 1.12] | 0.96 [0.93 1.00] |
|                                |                      | High OPA       | 1.16 [1.05 1.27] | 1.02 [0.83 1.24] |
| Leisure-time physical activity | Minimum effect sizes | Sedentary LTPA | 1.00 (reference) | 1.00 (reference) |
|                                |                      | Low LTPA       | 0.86 [0.82 0.91] | 0.81 [0.76 0.87] |
|                                |                      | Moderate LTPA  | 0.77 [0.71 0.84] | 0.77 [0.74 0.80] |
|                                |                      | High LTPA      | 0.77 [0.70 0.83] | 0.71 [0.63 0.80] |
|                                | Maximum effect sizes | Sedentary LTPA | 1.00 (reference) | 1.00 (reference) |
|                                |                      | Low LTPA       | 0.90 [0.87 0.93] | 0.87 [0.84 0.89] |
|                                |                      | Moderate LTPA  | 0.82 [0.75 0.88] | 0.78 [0.73 0.84] |
|                                |                      | High LTPA      | 0.81 [0.73 0.88] | 0.80 [0.67 0.94] |

HR = hazard ratio; 95% CI = 95% confidence interval; OPA = Occupational physical activity; LTPA = Leisure-time physical activity  
Occupational physical activity levels reflect the physical activity continuum, i.e., sedentary, low, moderate, and high. Categories roughly indicate: mainly sitting work (sedentary), work that mainly involves standing or walking, but without lifting or carrying loads (low), work that involves carrying light objects or walking stairs (moderate), physically demanding work involving frequent carrying or lifting heavy loads (high).  
Leisure-time physical activity levels reflect the physical activity continuum, i.e., sedentary, low, moderate, and high. Categories roughly indicate: almost no regular physical activity, spending most leisure time sitting (sedentary), occasionally engaging in leisure time activities such as slow walking or household activities (low), engaging in activities such as intense household activities or brisk walking (moderate), regular engagement in activities such as jogging or cycling (high).
